# Supplementary material for: Anthropocene geochemistry of metals in sediment cores from the Laurentian Great Lakes
Source: PeerJ. 2020 May 6;8:e9034. doi: 10.7717/peerj.9034 (PMC7210812; doi:10.7717/peerj.9034)
Supplement: Supplemental Information 1 — Includes a metadata tab and a tab for each core location. [file peerj-08-9034-s001.xlsx]

## Sheet: meta
worksheet	Parameter	description
Total 210Pb	Top of interval	(cm)
	Base of interval	(cm)
	Cum. Dry mass	(g/cm2)
	Unsup. Activity	(Bq/g)
	Error of Unsup. Act.	(±s.d.)
	Cum. Act. below Int.	(Bq/cm2)
	Age: Base if int.	(yr)
	Error of age	(±s.d.)
	Date A.D.
	Sediment Accum.	(g/cm2 yr)
	Error of Sed. Accum.	(±s.d.)
137Cs	Interval	sediment depth (cm)
(ERW only)	Cs-137	(pCi/g)
Core IDs	Core name	Code	Alternative name	Associated articles including core
	Superior West	SUW		Reavie et al. 2017, Alexson et al. 2018
	Superior Central	SUIR	BH10-2, IR#2, IR MC	Chraïbi Shaw et al. 2014, Reavie et al. 2017, O'Beirne et al 2017
	Superior East	SULG	LG10-1, LG#1, LG MC	Reavie et al. 2014, Chraïbi Shaw et al. 2014, Reavie et al. 2017, O'Beirne et al 2017
	Michigan North	MI41N		Reavie et al. 2017
	Michigan Mid-South	MIC51S	C-5-1
	Michigan Far South	MIB41	B-4-1
	Huron North	HUK78		Reavie et al. 2017, Sgro et al. 2018a
	Huron South	HU12		Reavie et al. 2017, Sgro et al. 2018a
	Erie West	ERW		Reavie et al. 2017, Sgro et al. 2018b
	Erie Central	ERC		Reavie et al. 2017, Reavie et al. 2016, Sgro et al. 2018b
	Ontario West	ONW		Reavie et al. 2017
	Ontario East	ONE		Reavie et al. 2017
Articles	Alexson, E.E., E.D. Reavie, R.P. Axler, S.V. Yemets, P.A. Krasutsky, M.B. Edlund, R.W. Pillsbury, D. Desotelle 2018. Paleolimnology of a freshwater estuary to inform Area of Concern nutrient delisting efforts. Journal of Paleolimnology 59: 373-395.
	Shaw Chraïbi, V.L., A.R. Kireta, E.D. Reavie, T.N. Brown, M. Cai 2014. A paleolimnological assessment of human impacts on Lake Superior. Journal of Great Lakes Research 40(4): 886-897.
	Reavie, E.D., M. Cai, M.R. Twiss, H.J. Carrick, T.W. Davis, T.H. Johengen, D. Gossiaux, D.E. Smith, D. Palladino, A. Burtner, G.V. Sgro 2016. Winter-spring diatom production in Lake Erie is an important driver of summer hypoxia. Journal of Great Lakes Research 42: 608-618.
	Reavie, E.D., G.V. Sgro, L.R. Estepp, A.J. Bramburger, R.W. Pillsbury, V.L. Shaw Chraïbi, M. Cai, C.A. Stow, A. Dove 2017. Climate warming and changes in Cyclotella sensu lato in the Laurentian Great Lakes. Limnology and Oceanography 62: 768-783.
	O’Beirne, M.D., J.P. Werne, R.E. Hecky, T.C. Johnson, S. Katsev, E.D. Reavie 2017. Anthropogenic climate change has altered primary productivity in Lake Superior. Nature Communications 8: 15713.
	Sgro, G.V., E.D. Reavie 2018a. Fossil diatoms, geochemistry and the Anthropocene paleolimnology of Lake Huron. Journal of Great Lakes Research 44: 765-778.
	Sgro, G.V., E.D. Reavie 2018b. Lake Erie’s ecological history reconstructed from the sedimentary record. Journal of Great Lakes Research 44: 54-69.

## Sheet: SUW
Top of	Base of	Cum.	Unsup.	Error of	Cum. Act.	Age: Base	Error of	Date	Sediment	Error of
Interval	Interval	Dry Mass	Activity	Unsup. Act.	below Int.	of Int.	Age	A.D.	Accum.	Sed. Accum.
(cm)	(cm)	(g/cm2)	(pCi/g)	(±s.d.)	(pCi/cm2)	(yr)	(±s.d.)		(g/cm2 yr)	(±s.d.)
0	0.25	0.0386	15.846	0.5982	30.4298	0.64	2.5	2013.7	0.0604	0.00402
2.5	2.75	0.6038	10.9522	0.337	23.1337	9.44	2.44	2004.9	0.0669	0.00403
4	4.25	1.0724	10.8667	0.2469	18.0251	17.46	2.79	1996.9	0.0529	0.00369
5.5	5.75	1.6002	7.2545	0.2124	13.4781	26.79	2.84	1987.6	0.0593	0.00437
7	7.25	2.1712	4.1078	0.1281	10.474	34.89	2.57	1979.5	0.0809	0.00528
8.5	8.75	2.7571	2.4261	0.1345	8.6809	40.92	2.42	1973.5	0.1129	0.00846
10	10.5	3.5081	2.0708	0.089	7.0277	47.7	2.66	1966.7	0.1092	0.00801
13	13.5	4.8023	1.673	0.1026	4.6535	60.94	3.1	1953.4	0.0898	0.00872
15	15.5	5.6877	1.1344	0.0773	3.4815	70.26	3.47	1944.1	0.0991	0.01104
17	17.5	6.5654	1.243	0.0793	2.427	81.85	4.57	1932.5	0.0641	0.0089
19	19.5	7.4577	0.6657	0.0785	1.6543	94.15	5.18	1920.2	0.0809	0.01489
21	21.5	8.3867	0.4243	0.0664	1.1792	105.03	6.58	1909.3	0.0901	0.02179
23	23.5	9.2937	0.2663	0.0634	0.8849	114.25	8.27	1900.1	0.1068	0.0358
25	25.5	10.1581	0.3376	0.0603	0.6166	125.85	11.5	1888.5	0.0602	0.02261
27	27.5	11.012	0.2383	0.0627	0.3819	141.23	17.98	1873.1	0.0532	0.03082
29	29.5	11.9031	0.1946	0.0584	0.1941	162.96	34.6	1851.4	0.0345	0.0348
30	30.5	12.3967	0.0731	0.0593	0.1437	172.62	46.39	1841.8	0.0651	0.10154

## Sheet: SUIR
Top of	Base of	Cum.	Unsup.	Error of	Cum. Act.	Age: Base	Error of	Date	Sediment	Error of
Interval	Interval	Dry Mass	Activity	Unsup. Act.	below Int.	of Int.	Age	A.D.	Accum.	Sed. Accum.
(cm)	(cm)	(g/cm2)	(pCi/g)	(±s.d.)	(pCi/cm2)	(yr)	(±s.d.)		(g/cm2 yr)	(±s.d.)
0	0.5	0.0551	47.3906	1.2806	32.8041	2.46	1.56	2008	0.0224	0.00097
1	1.5	0.2258	44.4473	1.135	25.1101	11.04	1.82	1999.4	0.019	0.00093
2	2.5	0.431	33.8024	0.4988	17.6759	22.32	2.17	1988.1	0.0179	0.00099
3	3.5	0.6837	18.5377	0.2982	12.2117	34.19	1.87	1976.2	0.0225	0.00104
4	4.5	0.9679	10.8506	0.3304	8.6595	45.23	1.3	1965.2	0.0271	0.00096
5	5.5	1.2588	8.8807	0.1706	5.9403	57.33	1.32	1953.1	0.023	0.00065
5.5	6	1.404	7.4599	0.2491	4.8571	63.8	1.41	1946.6	0.0225	0.0009
6	6.5	1.5505	7.185	0.2704	3.8045	71.64	1.55	1938.8	0.0187	0.00085
6.5	7	1.6951	6.1929	0.2335	2.9093	80.26	1.78	1930.2	0.0168	0.00086
7	7.5	1.8411	5.3844	0.2034	2.1234	90.37	2.18	1920.1	0.0144	0.00087
7.5	8	1.9851	4.2619	0.1843	1.5099	101.32	2.83	1909.1	0.0132	0.00103
8	8.5	2.127	2.829	0.1497	1.1085	111.24	3.68	1899.2	0.0143	0.0015
8.5	9	2.2718	1.8635	0.1208	0.8387	120.2	4.72	1890.2	0.0162	0.00222
9.5	10	2.5614	0.844	0.0892	0.5282	135.05	5.87	1875.4	0.0217	0.00408
11.5	12	3.1343	0.4713	0.0513	0.1822	169.23	8.82	1841.2	0.0142	0.00358
13	13.5	3.5637	0.1907	0.0484	0.0621	203.79	13.7	1806.6	0.0122	0.00506

## Sheet: SULG
Top of	Base of	Cum.	Unsup.	Error of	Cum. Act.	Age: Base	Error of	Date	Sediment	Error of
Interval	Interval	Dry Mass	Activity	Unsup. Act.	below Int.	of Int.	Age	A.D.	Accum.	Sed. Accum.
(cm)	(cm)	(g/cm2)	(pCi/g)	(±s.d.)	(pCi/cm2)	(yr)	(±s.d.)		(g/cm2 yr)	(±s.d.)
0	0.5	0.0347	66.0841	1.9375	54.3757	1.33	3.43	2009	0.0262	0.00212
2	2.5	0.2985	51.8754	1.3523	39.4939	11.6	4.02	1998.7	0.025	0.00248
4	4.5	0.6852	31.1767	0.9648	24.8712	26.45	4.34	1983.8	0.0264	0.00291
6	6.5	1.1307	14.709	0.4974	16.0827	40.45	3.57	1969.8	0.0358	0.00305
8	8.5	1.6332	9.6841	0.3629	10.372	54.53	3.82	1955.8	0.0354	0.00336
10	10.5	2.1387	5.3103	0.2254	6.9582	67.35	3.47	1942.9	0.0427	0.00366
12	12.5	2.5997	3.9487	0.1931	4.9133	78.53	4	1931.8	0.0404	0.00432
14	14.5	3.0623	2.7691	0.1474	3.4426	89.95	4.81	1920.3	0.0405	0.00544
16	16.5	3.5359	2.0851	0.1358	2.3392	102.36	6.35	1907.9	0.0368	0.00682
18	18.5	4.0256	1.0572	0.0917	1.6513	113.54	7.91	1896.8	0.0505	0.01217
20	21	4.666	1.304	0.1165	0.8697	134.13	14.34	1876.2	0.0246	0.00943
24	25	5.7187	0.3025	0.0698	0.2064	180.32	14.78	1830	0.0252	0.01094
26	27	6.2664	0.1609	0.0702	0.0995	203.75	28.59	1806.5	0.0233	0.01925

## Sheet: MIC51S
Top of	Base of	Cum.	Unsup.	Error of	Cum. Act.	Age: Base	Error of	Date	Sediment	Error of
Interval	Interval	Dry Mass	Activity	Unsup. Act.	below Int.	of Int.	Age	A.D.	Accum.	Sed. Accum.
(cm)	(cm)	(g/cm2)	(pCi/g)	(±s.d.)	(pCi/cm2)	(yr)	(±s.d.)		(g/cm2 yr)	(±s.d.)
0	0.25	0.0252	20.658	0.8287	21.833	0.76	0.87	2008.6	0.0333	0.00147
0.25	0.5	0.0541	19.9922	0.767	21.2557	1.62	0.88	2007.7	0.0336	0.00143
0.5	0.75	0.0883	19.8569	0.7457	20.5771	2.66	0.9	2006.7	0.0328	0.00138
1	1.25	0.1679	18.5604	0.7381	19.0762	5.09	0.93	2004.3	0.0327	0.00146
1.75	2	0.3108	19.4208	0.6257	16.3421	10.06	1.02	1999.3	0.027	0.00108
2.75	3	0.5415	19.0111	0.6706	11.9228	20.18	1.25	1989.2	0.0205	0.00096
3.25	3.5	0.6736	16.9876	0.5543	9.6159	27.09	1.46	1982.3	0.0187	0.00093
3.75	4	0.8174	13.7675	0.4655	7.5279	34.95	1.72	1974.4	0.0181	0.00103
4.25	4.5	0.969	9.3457	0.3315	5.9597	42.45	1.93	1966.9	0.021	0.00133
4.75	5	1.1215	5.538	0.2626	4.987	48.17	2.07	1961.2	0.0292	0.00218
5.5	5.75	1.3504	3.7953	0.1669	3.9959	55.29	2.31	1954.1	0.034	0.0027
6	6.25	1.5067	3.406	0.1331	3.4489	60.02	2.65	1949.3	0.0327	0.00281
6.25	6.5	1.5905	2.9969	0.1432	3.1977	62.45	2.85	1946.9	0.0345	0.00328
6.75	7	1.764	1.8755	0.0651	2.8284	66.39	3.16	1943	0.0483	0.00481
7	7.5	1.9412	1.1873	0.0634	2.618	68.87	3.4	1940.5	0.0714	0.00804
7.5	8	2.1275	0.8688	0.0634	2.4562	70.92	3.61	1938.4	0.0909	0.01169
8	8.5	2.353	0.3103	0.048	2.3862	71.85	3.71	1937.5	0.2429	0.04599
8.5	9	2.5842	0.2126	0.0454	2.3371	72.51	3.79	1936.8	0.3463	0.08343
9.5	10	3.1116	0.0676	0.0414	2.2838	73.25	3.86	1936.1	1.0538	0.65327
10.5	11	3.7199	0.0265	0.0392	2.2617	73.57	3.89	1935.8	2.6693	3.96439
12.5	13	4.8079	0.5215	0.044	1.9263	78.72	2.97	1930.6	0.1188	0.01424
13.5	14	5.3084	1.5074	0.0738	1.3115	91.07	3.26	1918.3	0.0308	0.00302
14.5	15	5.8598	0.7644	0.0603	0.8	106.94	3.44	1902.4	0.0368	0.00431

## Sheet: MIB41
Top of	Base of	Cum.	Unsup.	Error of	Cum. Act.	Age: Base	Error of	Date	Sediment
Interval	Interval	Dry Mass	Activity	Unsup. Act.	below Int.	of Int.	Age	A.D.	Accum.
(cm)	(cm)	(g/cm2)	(pCi/g)	(±s.d.)	(pCi/cm2)	(yr)	(±s.d.)		(g/cm2 yr)
0	0.25	0.0252	20.658	0.8287	21.833	0.76	0.87	2008.6	0.0333
0.25	0.5	0.0541	19.9922	0.767	21.2557	1.62	0.88	2007.7	0.0336
0.5	0.75	0.0883	19.8569	0.7457	20.5771	2.66	0.9	2006.7	0.0328
1	1.25	0.1679	18.5604	0.7381	19.0762	5.09	0.93	2004.3	0.0327
1.75	2	0.3108	19.4208	0.6257	16.3421	10.06	1.02	1999.3	0.027
2.75	3	0.5415	19.0111	0.6706	11.9228	20.18	1.25	1989.2	0.0205
3.25	3.5	0.6736	16.9876	0.5543	9.6159	27.09	1.46	1982.3	0.0187
3.75	4	0.8174	13.7675	0.4655	7.5279	34.95	1.72	1974.4	0.0181
4.25	4.5	0.969	9.3457	0.3315	5.9597	42.45	1.93	1966.9	0.021
4.75	5	1.1215	5.538	0.2626	4.987	48.17	2.07	1961.2	0.0292
5.5	5.75	1.3504	3.7953	0.1669	3.9959	55.29	2.31	1954.1	0.034
6	6.25	1.5067	3.406	0.1331	3.4489	60.02	2.65	1949.3	0.0327
6.25	6.5	1.5905	2.9969	0.1432	3.1977	62.45	2.85	1946.9	0.0345
6.75	7	1.764	1.8755	0.0651	2.8284	66.39	3.16	1943	0.0483
7	7.5	1.9412	1.1873	0.0634	2.618	68.87	3.4	1940.5	0.0714
7.5	8	2.1275	0.8688	0.0634	2.4562	70.92	3.61	1938.4	0.0909
8	8.5	2.353	0.3103	0.048	2.3862	71.85	3.71	1937.5	0.2429
8.5	9	2.5842	0.2126	0.0454	2.3371	72.51	3.79	1936.8	0.3463
9.5	10	3.1116	0.0676	0.0414	2.2838	73.25	3.86	1936.1	1.0538
10.5	11	3.7199	0.0265	0.0392	2.2617	73.57	3.89	1935.8	2.6693
12.5	13	4.8079	0.5215	0.044	1.9263	78.72	2.97	1930.6	0.1188
13.5	14	5.3084	1.5074	0.0738	1.3115	91.07	3.26	1918.3	0.0308
14.5	15	5.8598	0.7644	0.0603	0.8	106.94	3.44	1902.4	0.0368

## Sheet: MI41N
Top of	Base of	Cum.	Unsup.	Error of	Cum. Act.	Age: Base	Error of	Date	Sediment	Error of
Interval	Interval	Dry Mass	Activity	Unsup. Act.	below Int.	of Int.	Age	A.D.	Accum.	Sed. Accum.
(cm)	(cm)	(g/cm2)	(pCi/g)	(±s.d.)	(pCi/cm2)	(yr)	(±s.d.)		(g/cm2 yr)	(±s.d.)
0	1	0.0843	29.1612	1.0196	22.0329	3.4	2.83	2010.2	0.0248	0.00175
2.5	3	0.3342	23.5761	0.7943	15.7325	14.21	3.36	1999.4	0.0219	0.00192
4.5	5	0.7084	13.1801	0.493	9.589	30.11	2.07	1983.5	0.0243	0.00104
5.5	6	0.9035	10.65	0.258	7.3915	38.47	2.11	1975.1	0.0231	0.00082
6.5	7	1.0919	9.0832	0.2121	5.6093	47.33	2.22	1966.3	0.0207	0.00083
7.5	8	1.2906	6.9398	0.2302	4.1318	57.15	2.31	1956.4	0.0201	0.00098
8.5	9	1.5002	5.6388	0.2824	2.8856	68.67	2.53	1944.9	0.0175	0.00116
9.5	10	1.7172	3.6153	0.1269	2.0016	80.42	2.58	1933.2	0.0189	0.00112
10	10.5	1.8271	3.1073	0.101	1.6602	86.43	2.82	1927.2	0.0183	0.00122
11	11.5	2.0541	2.1309	0.104	1.125	98.92	3.24	1914.7	0.0182	0.00157
12	12.5	2.2943	1.0442	0.062	0.8159	109.24	3.28	1904.4	0.0262	0.00249
13	13.5	2.536	0.6927	0.075	0.6281	117.64	3.76	1896	0.0301	0.00419
14	14.5	2.7849	0.4798	0.0542	0.4959	125.23	4.41	1888.4	0.0341	0.0054
15	16	3.1631	0.5065	0.0679	0.3064	140.69	6.44	1872.9	0.0225	0.00445
16	17	3.425	0.3342	0.063	0.2189	151.49	8.48	1862.1	0.0243	0.00659
18	19	3.9338	0.2023	0.0493	0.0993	176.87	16.67	1836.7	0.0189	0.00882

## Sheet: HUK78
Top of	Base of	Cum.	Unsup.	Error of	Cum. Act.	Age: Base	Error of	Date	Sediment	Error of
Interval	Interval	Dry Mass	Activity	Unsup. Act.	below Int.	of Int.	Age	A.D.	Accum.	Sed. Accum.
(cm)	(cm)	(g/cm2)	(pCi/g)	(±s.d.)	(pCi/cm2)	(yr)	(±s.d.)		(g/cm2 yr)	(±s.d.)
0	0.5	0.0975	23.4276	0.8553	48.4835	1.48	1.99	2011.1	0.066	0.00373
2	3	0.6369	16.427	0.5919	38.4893	8.89	2.07	2003.6	0.0764	0.0044
4	5	1.1027	14.7921	0.4953	31.4163	15.41	2.33	1997.1	0.0697	0.00447
7	8	1.7967	10.9189	0.2266	22.9998	25.43	2.66	1987.1	0.0691	0.00484
9	10	2.2626	8.9986	0.2058	18.5943	32.25	3.11	1980.3	0.0679	0.00577
13	14	3.2232	5.6547	0.1695	12.0798	46.1	3.23	1966.4	0.0702	0.00638
17	18	4.2165	3.935	0.2326	7.5774	61.08	3.94	1951.5	0.0638	0.00777
21	22	5.2137	2.3211	0.1725	4.7127	76.33	4.53	1936.2	0.067	0.00972
24	26	6.2224	1.671	0.1255	2.8485	92.5	6.94	1920	0.0606	0.01199
28	30	7.2283	1.0306	0.1147	1.6598	109.84	11.24	1902.7	0.0576	0.01841
32	34	8.2768	0.5874	0.111	0.9351	128.27	19.27	1884.3	0.0575	0.03135
36	38	9.3482	0.3562	0.1124	0.4935	148.79	35.81	1863.7	0.051	0.05036

## Sheet: HU12
Top of	Base of	Cum.	Unsup.	Error of	Cum. Act.	Age: Base	Error of	Date	Sediment	Error of
Interval	Interval	Dry Mass	Activity	Unsup. Act.	below Int.	of Int.	Age	A.D.	Accum.	Sed. Accum.
(cm)	(cm)	(g/cm2)	(pCi/g)	(±s.d.)	(pCi/cm2)	(yr)	(±s.d.)		(g/cm2 yr)	(±s.d.)
0	0.5	0.0334	18.2188	0.3944	44.5134	0.44	1.09	2012.1	0.0766	0.00247
2.2	3	0.4251	14.7148	0.2787	38.342	5.23	1.13	2007.3	0.0836	0.00261
4.5	5	0.948	11.1143	0.2287	31.9475	11.09	1.07	2001.4	0.0918	0.00278
6	7	1.4821	10.5614	0.4139	26.2206	17.43	1.18	1995.1	0.0812	0.00371
8	9	2.0034	9.4957	0.3701	21.1356	24.35	1.32	1988.2	0.0733	0.00356
10	11	2.5975	6.7617	0.2777	16.7582	31.81	1.35	1980.7	0.0819	0.00415
12	13	3.1995	6.0446	0.2718	13.0132	39.93	1.59	1972.6	0.0716	0.00419
14	15	3.82	4.4992	0.2158	9.9997	48.39	1.79	1964.1	0.074	0.00482
16	17	4.5035	3.7298	0.1893	7.3275	58.37	2.24	1954.2	0.0665	0.00509
18	19	5.2982	2.5044	0.1067	5.1213	69.88	2.75	1942.7	0.0699	0.00591
20	21	6.0671	1.7743	0.0928	3.6219	81	3.57	1931.5	0.0692	0.00768
22	23	6.9134	1.0095	0.0773	2.6249	91.34	4.47	1921.2	0.0876	0.01274
25	26	8.1604	0.6477	0.0528	1.6727	105.81	6.28	1906.7	0.0866	0.01697
26	28	9.1708	0.6007	0.0543	1.0658	120.28	9.67	1892.3	0.0698	0.01762
28	30	10.0512	0.2968	0.0491	0.8045	129.32	12.68	1883.2	0.0975	0.03633
30	32	11.3462	0.2579	0.0505	0.4705	146.54	21.19	1866	0.0752	0.04003

## Sheet: ERW
Top of	Base of	Cum.	Unsup.	Error of	Cum. Act.	Age: Base	Error of	Date	Sediment	Error of
Interval	Interval	Dry Mass	Activity	Unsup. Act.	below Int.	of Int.	Age	A.D.	Accum.	Sed. Accum.
(cm)	(cm)	(g/cm2)	(pCi/g)	(±s.d.)	(pCi/cm2)	(yr)	(±s.d.)		(g/cm2 yr)	(±s.d.)
0	0.5	0.0474	4.2995	0.1709	37.825	0.17	1.82	2011.4	0.275	0.01549
4	4.5	1.2175	4.3988	0.1951	32.7251	4.82	1.96	2006.7	0.2351	0.01483
8	8.5	3.0657	3.4444	0.1505	25.6288	12.67	2.06	1998.9	0.2354	0.01546
10	11	4.3013	3.0192	0.1439	21.7293	17.97	2.28	1993.6	0.2318	0.01696
14	15	6.2918	2.6711	0.131	16.1583	27.49	2.78	1984.1	0.196	0.01717
18	19	8.3808	1.7751	0.0999	11.8057	37.56	3.07	1974	0.2154	0.02147
20	21	9.4736	1.5314	0.0665	10.0675	42.68	3.51	1968.9	0.2131	0.02264
22	23	10.5779	1.3984	0.0568	8.4872	48.16	4.07	1963.4	0.1975	0.02404
24	25	11.7403	1.0054	0.0585	7.2115	53.39	4.7	1958.2	0.2324	0.03403
26	27	13.0578	0.6182	0.0373	6.2809	57.83	5.31	1953.7	0.3269	0.05424
28	29	14.5444	0.4576	0.0477	5.5441	61.84	5.96	1949.7	0.389	0.07889
30	31	16.0136	0.5321	0.0426	4.7904	66.53	6.85	1945	0.2915	0.0629
32	33	17.4467	0.5158	0.0358	4.0454	71.96	8.06	1939.6	0.2552	0.06292
34	35	18.9093	0.5556	0.0504	3.2473	79.01	9.99	1932.5	0.1933	0.05862
35	36.5	20.2158	0.3424	0.0474	2.8	83.77	11.54	1927.8	0.2745	0.09773
Interval	Cs-137 (pCi/g)
15-16	0.99
17-18	1.15
19-20	1.23
20-21	1.39
23-24	1.52
25-26	0.76
27-28	0.39

[truncated: 3 more sheets: ERC, ONW, ONE]
