# Supplementary material for: Anthropocene geochemistry of metals in sediment cores from the Laurentian Great Lakes
Source: PeerJ. 2020 May 6;8:e9034. doi: 10.7717/peerj.9034 (PMC7210812; doi:10.7717/peerj.9034)
Supplement: Supplemental Information 2 — Raw metal analyte data expressed both in parts per million sediment dry weight and in accumulation rate (µg/cm2/y). [file peerj-08-9034-s002.xlsx]

## Sheet: meta
Column label
Lake	Great Lake name
Core code	Core identifier code
Depth	Sediment core depth (cm)
date	Pb-210 date (AD) associated with interval
accum rate	Estimated sediment accumulation rate at interval (g dry wt/cm²/y)
Core code IDs	Core name	Code	Alternative name	Associated articles also including this core
	Superior West	SUW		Reavie et al. 2017, Alexson et al. 2018
	Superior Central	SUIR	BH10-2, IR#2, IR MC	Chraïbi Shaw et al. 2014, Reavie et al. 2017, O'Beirne et al 2017
	Superior East	SULG	LG10-1, LG#1, LG MC	Reavie et al. 2014, Chraïbi Shaw et al. 2014, Reavie et al. 2017, O'Beirne et al 2017
	Michigan North	MI41N		Reavie et al. 2017
	Michigan Mid-South	MIC51S	C-5-1
	Michigan Far South	MIB41	B-4-1
	Huron North	HUK78		Reavie et al. 2017, Sgro et al. 2018a
	Huron South	HU12		Reavie et al. 2017, Sgro et al. 2018a
	Erie West	ERW		Reavie et al. 2017, Sgro et al. 2018b
	Erie Central	ERC		Reavie et al. 2017, Reavie et al. 2016, Sgro et al. 2018b
	Ontario West	ONW		Reavie et al. 2017
	Ontario East	ONE		Reavie et al. 2017
Articles	Alexson, E.E., E.D. Reavie, R.P. Axler, S.V. Yemets, P.A. Krasutsky, M.B. Edlund, R.W. Pillsbury, D. Desotelle 2018. Paleolimnology of a freshwater estuary to inform Area of Concern nutrient delisting efforts. Journal of Paleolimnology 59: 373-395.
	Shaw Chraïbi, V.L., A.R. Kireta, E.D. Reavie, T.N. Brown, M. Cai 2014. A paleolimnological assessment of human impacts on Lake Superior. Journal of Great Lakes Research 40(4): 886-897.
	Reavie, E.D., M. Cai, M.R. Twiss, H.J. Carrick, T.W. Davis, T.H. Johengen, D. Gossiaux, D.E. Smith, D. Palladino, A. Burtner, G.V. Sgro 2016. Winter-spring diatom production in Lake Erie is an important driver of summer hypoxia. Journal of Great Lakes Research 42: 608-618.
	Reavie, E.D., G.V. Sgro, L.R. Estepp, A.J. Bramburger, R.W. Pillsbury, V.L. Shaw Chraïbi, M. Cai, C.A. Stow, A. Dove 2017. Climate warming and changes in Cyclotella sensu lato in the Laurentian Great Lakes. Limnology and Oceanography 62: 768-783.
	O’Beirne, M.D., J.P. Werne, R.E. Hecky, T.C. Johnson, S. Katsev, E.D. Reavie 2017. Anthropogenic climate change has altered primary productivity in Lake Superior. Nature Communications 8: 15713.
	Sgro, G.V., E.D. Reavie 2018a. Fossil diatoms, geochemistry and the Anthropocene paleolimnology of Lake Huron. Journal of Great Lakes Research 44: 765-778.
	Sgro, G.V., E.D. Reavie 2018b. Lake Erie’s ecological history reconstructed from the sedimentary record. Journal of Great Lakes Research 44: 54-69.
Metal analyte in parts per million sediment dry weight	Metal analyte accumulation rate	Method
Al ppm	Al µg/cm²/y	HCl-extracted sample analysis for major metals. Instrument : Thermo Scientific iCAP 6500 dual view ICP-OES (Inductively Coupled Plasma - Optical Emission Spectrometer). Power: 1150 W - Neb flow: 0.65 liters/min - Cooling gas: 12 liters/min - Aux gas: 0.5 liters/min - 1 ml/min sample flow rate. Integration: 8 sec/replicate and 5 replicates/sample - Mira Mist Peek nebulizer.
Ca ppm	Ba µg/cm²/y
Fe ppm	Ca µg/cm²/y
K ppm	Fe µg/cm²/y
Li ppm	K µg/cm²/y
Mg ppm	Li µg/cm²/y
Mn ppm	Mg µg/cm²/y
Na ppm	Mn µg/cm²/y
P ppm	Na µg/cm²/y
Si ppm	P µg/cm²/y
Ti ppm	Si µg/cm²/y
Sc ppm	Sr µg/cm²/y	Trace metals analysis of freeze-dried sediments. INSTRUMENTATION: Thermo Scientific XSERIES 2 ICP-MS w/ ESI PC3 Peltier cooled spray chamber, SC-FAST injection loop, and SC-4 autosampler. Samples were diluted appropriately and 20 ppb of In internal standard was added. All elements were analyzed using He/H2 collision-reaction mode.
V ppm	Ti µg/cm²/y
Cr ppm	Sc µg/cm²/y
Co ppm	V µg/cm²/y
Ni ppm	Cr µg/cm²/y
Cu ppm	Co µg/cm²/y
Zn ppm	Ni µg/cm²/y
Ga ppm	Cu µg/cm²/y
As ppm	Zn µg/cm²/y
Rb ppm	Ga µg/cm²/y
Sr ppm	As µg/cm²/y
Y ppm	Rb µg/cm²/y
Zr ppm	Y µg/cm²/y
Nb ppm	Zr µg/cm²/y
Mo ppm	Nb µg/cm²/y
Cd ppm	Mo µg/cm²/y
Sn ppm	Cd µg/cm²/y
Sb ppm	Sn µg/cm²/y
Cs ppm	Sb µg/cm²/y
Ba ppm	Cs µg/cm²/y
La ppm	La µg/cm²/y
Ce ppm	Ce µg/cm²/y
Pr ppm	Pr µg/cm²/y
Nd ppm	Nd µg/cm²/y
Sm ppm	Sm µg/cm²/y
Eu ppm	Eu µg/cm²/y
Gd ppm	Gd µg/cm²/y
Tb ppm	Tb µg/cm²/y
Dy ppm	Dy µg/cm²/y
Ho ppm	Ho µg/cm²/y
Er ppm	Er µg/cm²/y
Tm ppm	Tm µg/cm²/y
Yb ppm	Yb µg/cm²/y
Lu ppm	Lu µg/cm²/y
Hf ppm	Hf µg/cm²/y
Ta ppm	Ta µg/cm²/y
Pb ppm	Pb µg/cm²/y
Th ppm	Th µg/cm²/y
U ppm	U µg/cm²/y
Al2O3 ppm	Al²O3 µg/cm²/y	Freeze-dried sediment processed for major oxides. Instrument : Thermo Scientific iCAP 6500 dual view ICP-OES (Inductively Coupled Plasma - Optical Emission Spectrometer). Power: 1150 W - Neb flow: 0.65 liters/min - Cooling gas: 12 liters/min - Aux gas: 0.5 liters/min - 1 ml/min sample flow rate. Integration: 8 sec/replicate and 5 replicates/sample - Mira Mist Peek nebulizer.
BaO ppm	BaO µg/cm²/y
CaO ppm	CaO µg/cm²/y
Fe2O3 ppm	Fe²O3 µg/cm²/y
K2O ppm	K²O µg/cm²/y
MgO ppm	MgO µg/cm²/y
MnO ppm	MnO µg/cm²/y
Na2O ppm	Na²O µg/cm²/y
P2O5 ppm	P²O5 µg/cm²/y
SiO2 ppm	SiO² µg/cm²/y
SrO ppm	SrO µg/cm²/y
TiO2 ppm	TiO² µg/cm²/y

## Sheet: metals data
Lake	Core code	Depth	date	accum rate	Al ppm	Ca ppm	Fe ppm	K ppm	Li ppm	Mg ppm	Mn ppm	Na ppm	P ppm	Si ppm	Ti ppm	Sc ppm	V ppm	Cr ppm	Co ppm	Ni ppm	Cu ppm	Zn ppm	Ga ppm	As ppm	Rb ppm	Sr ppm	Y ppm	Zr ppm	Nb ppm	Mo ppm	Cd ppm	Sn ppm	Sb ppm	Cs ppm	Ba ppm	La ppm	Ce ppm	Pr ppm	Nd ppm	Sm ppm	Eu ppm	Gd ppm	Tb ppm	Dy ppm	Ho ppm	Er ppm	Tm ppm	Yb ppm	Lu ppm
Superior	SULG	0.125	2010.75	0.0262	7430.13	6093.13	14470.7	1223.53		3568.7	1726.37	191.14	603.307	5345.83	113.103	13.0775	112.025	81.79	20.5825	55.1525	231.325	194.8	19.7425	29.55	97.16	133.275	22.185	148.925	11.16	1.3935	2.07525	4.49575	1.2425	2.62725	506.075	35.435	69.3925	9.23	35.6425	6.7505	1.3595	6.09025	0.83325	4.97775	0.9495	2.85775	0.40325	2.7155	0.3935
Superior	SULG	0.375	2009.6	0.0262	7683.07	6033.5	15087	1237.43		3643.77	1779.7	195.25	620.873	5578.4	117.63	13.28	113.8	82.245	20.77	54.98	232.9	190.9	20.11	29.995	99.35	134.2	27.87	148.5	11.17	1.3715	2.085	4.628	1.2025	5.8305	514.15	36.315	70.61	9.3645	36.21	6.901	1.361	6.153	0.8315	4.9555	0.958	2.834	0.401	2.6955	0.3885
Superior	SULG	0.625	2008.38	0.026128	7737.1	6050.03	15129	1250.5		3672.53	1771.43	188.53	623.547	5670.13	118.54	13.4	113	86.86	115.05	57.85	237.6	188.95	19.88	29.11	100.02	133.65	27.75	149.5	11.23	1.2895	2.0115	4.6695	1.22	5.033	511.3	36.575	71.105	9.4825	36.97	6.8435	1.4025	6.127	0.848	5.0485	0.9665	2.874	0.4055	2.719	0.398
Superior	SULG	0.875	2007.09	0.025978	8132.37	6070.43	16115	1312		3895.9	1974.8	192.82	649.6	5954	118.34	13.255	112.35	82.75	40.62	55.54	230.65	187.85	19.99	27.12	103.35	132.4	27.89	149.25	11.175	1.127	2.015	4.671	1.2255	4.3265	509.75	36.35	71.57	9.523	37.94	6.9435	1.4105	6.22	0.841	5.027	0.97	2.915	0.4075	2.7195	0.399
Superior	SULG	1.125	2005.81	0.025828	7956.63	6092.9	16066	1294.77		3774.17	2465.67	178.287	655.393	5901.97	115.683	13.255	112.2	81.91	20.97	56.51	234.8	193.25	19.83	28.055	102.7	133.85	27.94	148.15	11.31	1.7115	2.2005	4.728	1.2005	3.706	516.4	36.385	70.98	9.3365	36.22	6.863	1.385	6.05	0.834	4.9485	0.951	2.848	0.3995	2.6765	0.3845
Superior	SULG	1.375	2004.52	0.025678	7279.6	5834.33	15366.3	1211.6		3509.37	2748.9	181.74	612.977	5611.73	116.083	13.63	114.4	83.375	21.91	57.895	240	198	20.15	29.445	103.35	132.7	28.155	150.05	11.215	1.49	2.259	4.738	1.2405	0.053	532.75	36.77	71.47	9.408	36.925	6.924	1.401	6.246	0.8585	5.0695	0.969	2.9165	0.415	2.755	0.404
Superior	SULG	1.625	2003.23	0.025528	7384.83	6047.37	18397.7	1196.9		3474.43	3289.53	174.183	725.697	5727.27	113.043	13.225	111.3	80.885	23.355	57.745	235.6	195.85	19.785	34.23	102.7	131.65	27.565	143.95	10.99	1.6245	2.34	4.635	1.214	4.5	536.3	36.47	70.535	9.4315	36.935	6.8505	1.371	6.1225	0.833	4.941	0.939	2.8495	0.399	2.665	0.388
Superior	SULG	1.875	2001.94	0.025378	8971.73	5839.7	19258.3	1388.03		4098.93	621.543	220.103	1163	6350.4	130.13	12.865	110.75	79.1	24.235	57.515	229.3	197.85	19.135	41.685	96.95	129.45	27.275	147.35	10.965	1.42	2.297	4.475	1.2005	5.9985	523.6	34.83	67.785	9.063	34.87	6.635	1.3435	5.9755	0.8155	4.796	0.93	2.7935	0.3955	2.6535	0.39
Superior	SULG	2.875	1995.94	0.025259	8349.53	4839.8	10772.7	1269.13		3825	302.767	177.897	457.01	5663.23	124.57	12.835	109.5	79.27	21.555	51.855	228.95	179.95	19.045	43.49	95.78	130.05	26.99	142.4	10.71	1.2515	1.6575	4.7975	1.2695	5.739	508.9	34.775	68.1	9.1655	35.94	6.696	1.346	5.981	0.8165	4.8695	0.9355	2.825	0.397	2.68	0.385
Superior	SULG	3.625	1990.36	0.025784	8971.73	5839.7	19258.3	1388.03		4098.93	621.543	220.103	1163	6350.4	130.13	13.56	114.55	83.75	19.75	55.44	237.2	197.55	20.175	21.7	104.4	133.6	28.39	149.1	11.315	0.9415	1.938	4.796	1.278	4.567	518.65	36.895	70.96	9.6565	37.155	7.014	1.416	6.25	0.8595	5.0855	0.9735	2.923	0.409	2.7465	0.3985
Superior	SULG	4.125	1986.63	0.026134	8408.8	5275.37	13736	1320.43		3836.63	489.067	197.697	1029.3	5704.03	125.537	12.54	108.6	78.405	18	51.855	224.3	196.8	18.74	14.685	98.18	125.85	26.875	139.65	10.73	0.7585	2.013	4.793	1.2325	5.264	488.35	35.425	66.25	8.9935	34.575	6.5175	1.3245	5.8925	0.8075	4.791	0.9285	2.7525	0.383	2.5625	0.371
Superior	SULG	5.125	1979.46	0.029314	8330.4	4951.8	12302	1283.83		3825.57	385.867	185.5	835.917	5814.5	122.75	13.815	118.9	86.225	20.11	57.67	258.05	210.25	20.775	13.07	106.7	133.7	29.5	153.85	11.695	0.5595	1.85	5.6535	1.4565	5.2885	530.95	38.965	72.1	9.781	38.19	7.217	1.448	6.455	0.8875	5.23	1.0015	3.0095	0.424	2.8125	0.4125
Superior	SULG	6.375	1970.71	0.035189	8349.53	4839.8	10772.7	1269.13		3825	302.767	177.897	457.01	5663.23	124.57	14.11	120.1	88.15	20.355	57.805	269.85	228	21.145	13.58	107.55	133.2	29.57	159.05	11.835	0.804	2.704	5.8295	1.55	5.2065	533.4	37.745	71.375	9.714	37.78	7.1755	1.441	6.4435	0.879	5.2025	1.0065	2.991	0.4235	2.8125	0.4105
Superior	SULG	8.125	1958.46	0.035476	7772.47	4451.03	12283.7	1162.1		3622.53	475.603	168.243	1096.43	5383.93	121.517	14.26	118.5	87.935	3078	641.55	456.2	203.5	20.855	17.91	104.95	132.9	29.19	151	23.755	1.9615	1.886	5.9645	1.8145	6.2445	543.6	40.355	72.8	9.906	38.43	7.213	1.4665	6.4315	0.883	5.2625	1.0105	3.0075	0.423	2.8425	0.411
Superior	SULG	9.625	1948.58	0.039488	7433.37	4250.8	11346	1129.6		3461.67	366.73	156.133	773.233	5312.43	122.79	12.925	107.8	79.045	20.07	53.13	238.1	169.8	19.225	15.36	99.765	130.15	26.865	144.7	10.67	0.8505	1.642	4.173	1.413	4.3745	521.55	36.82	65.885	9.164	35.695	6.6405	1.3345	5.868	0.806	4.7715	0.9195	2.7465	0.3845	2.5885	0.376
Superior	SULG	12.375	1932.52	0.0405495	8297	4399.07	11069	1288.73		3705.17	326.777	179.957	432.69	5713.1	128.35	13.125	111.05	82.205	17.795	49.73	126.15	136.35	20.095	11.085	108.35	134.6	28.355	148.3	10.835	0.677	1.0575	2.571	0.953	4.822	536.8	40.365	70.99	9.9385	38.405	7.132	1.4245	6.358	0.8615	5.0805	0.985	2.923	0.4055	2.732	0.397
Superior	SULG	14.125	1922.48	0.040481	8808.63	4472.03	11977	1407.37		3903.07	341.833	194.537	419.28	5902.57	132.987	13.695	110.5	84.88	20.935	49.64	78.26	115	20.19	8.74	113.2	140.6	29.1	148.7	11.03	0.832	0.5595	2.1385	0.647	4.2865	570.9	44.105	75.915	10.595	41.295	7.5285	1.4915	6.5535	0.8895	5.2735	1.006	2.994	0.4195	2.8065	0.4075
Superior	SULG	17.125	1904.46	0.041047	8356.8	4377.9	11039	1376.67		3776.93	316.397	177.873	403.17	5653.27	134.213	12.415	101.8	106.95	1598	63.64	63.5	99.245	18.94	7.0535	107.45	136.35	26.92	145.3	10.34	0.8475	0.3655	1.837	0.494	3.9595	538.6	40.505	69.985	9.9345	38.35	6.9725	1.37	6.1085	0.8285	4.913	0.9255	2.761	0.386	2.575	0.3755
Superior	SULG	26.75	1809.44	0.0235375	7538.77	4063.47	10624.3	1269.8		3432.57	295.53	156.947	476.497	5071.73	125.083	13.455	113.9	85.92	17.73	50.57	66.61	110.5	20.375	7.443	110.35	149.6	29.26	157	11.275	0.825	0.433	1.961	0.5595	11.11	569.25	43.445	73.795	10.415	40.415	7.444	1.484	6.5005	0.887	5.179	0.9895	2.971	0.4165	2.7765	0.4125
Superior	SULG	35.5	1706.74	0.0233	7897.63	4315.97	10590.7	1290.4		3635.77	265.73	183.88	378.817	5415.73	126.493	13.735	113.8	86.965	60.01	50.29	64.8	108.2	20.775	7.3465	113.75	146.1	29.885	156.75	11.66	0.763	0.439	1.9915	0.5585	6.6145	575.05	44.445	76.615	10.81	41.615	7.7105	1.527	6.756	0.914	5.436	1.0275	3.076	0.434	2.875	0.417
Superior	SUIR	0.125	2010.51	0.0224	7677.43	6705.37	11374.7	1585.77		4045.4	1542.37	4876.05	497.857	4932.8	128.4	13.97	114.1	105.9	36.965	61.63	172.3	185.75	21.99	15.95	117.9	171.8	22.4	128.5	11.815	1.204	1.6825	3.3265	0.792	5.229	566.6	42.585	85.84	9.7495	36.585	6.3865	1.292	5.4105	0.6985	4.055	0.767	2.242	0.3095	2.098	0.303
Superior	SUIR	0.375	2008.86	0.0224	8425.7	6201.8	12698.3	1653.27		4425.53	1769.5	829.333	507.823	5589.53	155.25	14.7	121	110.85	22.66	65.49	185.05	191.925	22.8625	16.32	123.4	177.375	23.21	127.225	12.33	0.994	1.744	3.5225	0.85025	5.5655	588.325	44.465	90.8625	10.1875	38.295	6.77025	1.3525	5.7615	0.75	4.349	0.8125	2.40375	0.33475	2.26175	0.32825
Superior	SUIR	0.625	2006.97	0.021992	8101.87	5832.13	12265.3	1584.9		4235.43	1734.03	324.01	502.163	5312.37	145.337	14.7675	119.925	109.075	22.545	65.9775	183.025	194.15	22.9875	16.505	122.5	177.625	23.17	125.5	12.2525	1.0805	1.77175	3.43775	0.8425	4.97525	582.35	43.97	88.5025	10.1325	38.185	6.68975	1.35725	5.71725	0.745	4.328	0.81125	2.38775	0.33325	2.19525	0.3235
Superior	SUIR	0.875	2004.82	0.021142	8140.57	5890.33	12262.7	1579.57		4245.07	1719.47	198.393	489.91	5351.07	146.883	14.81	122	112.3	977.8	453.7	306	196.35	22.865	16.645	124.9	178.7	23.46	128.25	26.155	1.8895	1.849	4.09	1.0495	5.4515	578.45	45.335	92.235	10.305	38.715	6.8285	1.3665	5.7225	0.761	4.356	0.8125	2.419	0.3335	2.25	0.327
Superior	SUIR	1.125	2002.67	0.020292	8536.17	5940.27	13036	1656.6		4466.37	1805.73	175.637	521.533	5552.17	147.733	14.66	119.325	109.875	22.47	65.04	185.625	194.35	22.8125	16.1875	122.875	177.65	23.5775	127.075	12.405	1.10225	1.7635	3.5005	0.85325	4.8505	584.025	43.9675	88.8025	10.25	39.2625	6.73425	1.3635	5.734	0.74625	4.33575	0.8085	2.38825	0.3315	2.21875	0.328
Superior	SUIR	1.375	2000.52	0.019442	8862.73	6097.03	13446	1709.4		4579.27	1737.47	172.937	527.573	5650.9	150.29	12.67	120.2	109.4	22.38	65.175	186.8	197.4	22.01	16.095	96.24	168.65	18.11	126.8	12.23	1.01	1.731	3.486	0.8535	5.18	554.45	35.9	70.68	8.119	30.125	5.2425	1.065	4.443	0.5845	3.352	0.636	1.873	0.2645	1.779	0.263
Superior	SUIR	1.625	1998.04	0.018868	8702.1	5900.37	13173.7	1674.93		4535.73	1642.83	164.893	510.47	5638.87	153.143	14.75	119.25	110.85	22.8	66.425	188	195.2	23.16	16.175	125.4	178.45	23.495	126.8	12.17	1.003	1.7825	3.5995	0.8825	4.4225	575.95	45.085	92.37	10.27	38.23	6.9	1.366	5.7855	0.7495	4.302	0.8175	2.434	0.3435	2.237	0.3285
Superior	SUIR	1.875	1995.22	0.018593	8473.5	5621.27	12556.3	1576.8		4339.57	1549.93	154.513	477.427	5403.3	149.443	14.865	118.55	114.25	85.08	65.72	185.4	196.3	22.93	15.75	123.4	175.45	23.36	129.75	12.205	1.2815	1.752	3.62	0.917	4.069	559.55	42.305	84.905	10.045	37.07	6.7385	1.3345	5.6645	0.7485	4.294	0.8065	2.3875	0.333	2.2225	0.324
Superior	SUIR	2.125	1992.39	0.018318	8799.33	5813.83	13166.7	1662.4		4519.6	2100.6	160.157	509.567	5659.57	155.153	14.79	120.9	111.2	23.095	66.64	186.9	201.3	23.34	16.32	125.15	179.4	23.44	126.85	12.32	1.063	2.003	3.557	0.8715	5.655	567.6	44.24	88.77	10.12	38.255	6.8225	1.355	5.7085	0.749	4.2775	0.8065	2.364	0.329	2.1945	0.321
Superior	SUIR	2.375	1989.57	0.018043	8464.93	6364.8	12095	1607.07		4333.37	5402.83	163.14	482.277	5430.6	150.583	14.72	121.5	109.8	23.12	73.795	194.9	232.65	22.865	16.1	123.5	180.6	23.685	127.55	12.365	2.0605	3.584	3.6235	0.875	5.426	618.85	44.19	90.275	10.255	38.12	6.7285	1.353	5.6365	0.7415	4.283	0.8035	2.413	0.3335	2.218	0.319
Superior	SUIR	2.625	1986.67	0.018452	8374.23	6593.77	12103.7	1641.4		4300.13	6911	183.46	492.977	5486	147.5	14.9775	121.6	111.75	25.1275	71.65	189.125	211.5	23.16	16.0375	125.525	184.025	23.6275	128.175	12.395	2.3455	2.0785	3.6595	0.887	5.381	629	43.69	88.535	10.3	38.7375	6.802	1.38	5.833	0.76125	4.34225	0.81775	2.4355	0.341	2.25375	0.328
Superior	SUIR	2.875	1983.7	0.019602	7843.27	6803.13	22775.7	1552.37		4015.07	6644.2	148.19	2549.07	5507.17	157.47	14.285	117	145.5	633.45	82.575	185.85	200.6	22.525	23.37	119.2	178.65	22.875	124.3	11.95	2.2	2.048	3.584	0.893	5.7595	599.3	42.545	85.565	9.728	36.025	6.4345	1.3045	5.441	0.7145	4.1485	0.7735	2.291	0.3205	2.1375	0.313
Superior	SUIR	3.625	1974.88	0.023052	8853.97	5292.47	18298	1679.43		4447.53	571.573	156.647	1357.53	5653.3	155.697	15.08	120.7	112.8	23.945	61.9	184.9	200.2	23.69	12.76	126.95	184.25	24.28	131.95	12.55	0.9745	1.049	4.013	0.892	4.8005	572	43.07	86.97	10.425	38.705	6.903	1.383	5.8155	0.7785	4.4495	0.8485	2.496	0.341	2.292	0.3365
Superior	SUIR	4.625	1963.75	0.026608	7825.33	5784.03	35464.7	1458.27		3806.83	1114.07	139.617	4485.33	5549.07	148.5	14.065	116.2	109.15	56.845	63.77	176.55	203.5	21.69	20.66	116.35	180.6	22.42	126.3	12.005	0.7375	2.594	4.096	0.944	5.489	695.55	41.04	83.36	9.761	37.035	6.4805	1.308	5.4515	0.7225	4.24	0.7915	2.3435	0.327	2.174	0.3195
Superior	SUIR	5.625	1951.54	0.02288	8524.23	4639.1	13318.7	1608.7		4310.97	635.587	155.123	498.933	5194.17	157.263	15.385	127.1	115.95	31.4	63.985	212.25	231	23.91	12.165	128.95	181.55	24.87	135.45	12.995	0.6895	2.351	4.3685	1.063	5.397	629.4	44.555	90.57	10.765	40.02	7.1465	1.433	6.054	0.7945	4.562	0.8605	2.5895	0.361	2.421	0.3465
Superior	SUIR	6.625	1936.74	0.018244	8801.87	4728.53	14188.3	1663.07		4494.47	701.71	153.083	547.543	5430.2	161.397	15.355	127.55	115.45	22.12	64.78	210.25	226.55	23.87	13.46	126.3	186.65	25.405	139.15	13.28	0.8455	1.728	4.313	1.0675	9.453	646.8	45.665	90.83	10.9	41.28	7.2265	1.4555	6.168	0.814	4.687	0.8935	2.617	0.3665	2.4295	0.3505
Superior	SUIR	7.125	1927.78	0.016224	8484.27	4714.9	13857	1590.67		4316.2	687.413	146.007	582.05	5235.53	160.19	15.385	125.45	114.75	22.34	65.145	200.05	213.6	24.335	13.83	128.5	184.65	25.12	134.2	12.955	0.719	1.3565	4.1045	1.035	6.036	641.75	46.365	94.385	10.87	40.675	7.2975	1.448	6.0225	0.7865	4.575	0.854	2.5195	0.3505	2.3455	0.3355
Superior	SUIR	8.625	1897.04	0.014756	8571.47	4407.07	14523.3	1650.43		4409.7	793.203	143.07	797.723	5350.33	161.16	15.66	126.05	116.1	23.105	69.66	168.75	180.65	24.325	11.17	129.7	185.6	25.025	134.7	12.765	0.4985	1.999	2.979	0.923	5.668	640.6	46.725	93.775	10.905	40.41	7.1695	1.4415	6.0535	0.789	4.539	0.8565	2.515	0.351	2.345	0.3385
Superior	SUIR	13.125	1815.37	0.0127067	9221.7	4650	15133.3	1823.9		4854.1	605.34	152.5	524.31	5805.07	167.207	16.59	131.9	124.8	24.49	69.88	68.25	139.25	25.455	8.362	142.75	199.3	25.765	140.6	13.335	0.8555	0.6645	2.164	0.437	4.3345	684.6	50.355	101.2	11.715	44.005	7.6645	1.5255	6.369	0.8225	4.7325	0.894	2.616	0.361	2.454	0.354
Superior	SUIR	20.25	1650.9	0.0122	8805.8	4407.87	23967.3	1722.93		4605.6	1924.73	147.723	4209.87	5608.33	170.493	15.605	121.85	115.9	24.18	68.075	63.16	128.6	23.97	8.3675	130.1	190.35	24.29	135.8	12.845	0.901	0.2195	2.0925	0.433	8.04	641.3	45.22	89.235	10.82	40.695	7.2295	1.429	6.0165	0.782	4.4505	0.8455	2.505	0.3465	2.3035	0.3375
Michigan	MI41N	0.5	2011.9	0.0248	5140.6	16141	12318.3	897.07		9399.93	4726.17	221.173	445.863	4359.5	70.846	13.86	110.65	103.32	18.27	75.64	95.84	384.45	20.675	28.95	122.4	122.65	21.995	112.7	11.22	3.0175	3.437	10.74	1.886	5.887	636.3	32.355	65.68	6.3855	28.5	5.4175	1.1255	4.805	0.5625	3.977	0.6585	2.2715	0.2925	2.2125	0.3045
Michigan	MI41N	1.75	2006.15	0.0237125	5207.83	14473.3	12486.3	865.067		8468.6	5222.5	203.507	423.287	4240.8	67.3613	13.145	104.05	98.995	17.335	70.715	91.335	392.85	19.775	27.125	117.45	120.7	21.265	110.1	10.28	2.3225	2.9625	10.42	1.782	9.3205	600.75	31.745	64.99	6.3625	28.48	5.325	1.1115	4.807	0.571	3.887	0.6535	2.2905	0.297	2.187	0.3045
Michigan	MI41N	2.75	2000.75	0.0222625	4874.23	14231.7	19108.7	851.327		8051.13	6222.37	198.383	1210.9	4995.6	71.9417	12.725	100.42	94.5	20.9	73.23	83.33	370.2	19.33	47.695	116.2	121.65	20.86	105.35	10.4	2.534	3.014	10.125	1.9475	5.81	740.85	30.585	62.545	6.065	27.53	5.2055	1.0535	4.6235	0.548	3.799	0.6315	2.1915	0.281	2.112	0.2945
Michigan	MI41N	3.75	1993.44	0.0228	5437.63	19173.7	8926	917.61		10580	650.72	200.94	328.77	3912.83	71.32	12.355	97.69	98.375	4011.5	802.6	183.45	356.25	19.57	9.9955	114.1	112.2	20.385	103.25	37.85	3.232	3.343	12.085	2.481	5.4905	493.5	30.31	61.49	6.053	26.92	5.004	1.051	4.5875	0.541	3.762	0.6185	2.157	0.281	2.1225	0.2955
Michigan	MI41N	4.75	1985.49	0.024	4773.43	20447.7	8031.47	842.82		9771.67	645.13	184.953	292.857	3707.93	71.02	11.8	95.66	97.44	13.775	55.72	84.56	384	18.6	8.928	108.15	107.65	19.895	99.95	11.62	0.915	3.9145	11.795	2.1975	5.299	462.4	28.93	59.095	5.7375	25.615	4.8575	1.007	4.344	0.5175	3.6025	0.601	2.0775	0.2675	1.9805	0.274
Michigan	MI41N	5.75	1977.2	0.0234	5169.4	23220.7	9647.37	866.74		10124	1335.3	188.473	406.92	3906.93	74.0027	11.2475	89.38	95.1625	12.8825	51.28	86.09	410.25	17.5525	11.11	102.6	104.625	18.7325	94.2775	9.0355	1.00175	3.88525	12.52	2.124	5.1335	447.825	27.685	55.2925	5.4755	24.715	4.65425	0.97775	4.225	0.50275	3.50625	0.5815	2.00725	0.26275	1.94325	0.27575
Michigan	MI41N	6.75	1968.5	0.0213	4637.47	24378.7	9646.03	805.413		9039.3	1336.7	185.87	710.57	3811.33	73.439	10.98	86.56	94.54	15.145	57.64	82.21	427.35	17.345	14.05	100.12	103.8	17.825	90.065	9.228	1.0585	3.655	12.645	2.171	4.898	431.7	26.69	54.445	5.28	23.9	4.512	0.9325	4.047	0.481	3.3305	0.549	1.9205	0.2485	1.837	0.2525
Michigan	MI41N	7.75	1958.88	0.02025	5181.23	24193	11806	873.83		9062.63	1130.97	193.313	465.37	4215.8	75.8363	11.87	94.015	92.52	15.68	59.615	81.155	404.7	18.405	15.405	107.25	110.55	19.675	97.785	10.0695	1.3295	3.979	12.125	2.1685	5.27	476.6	28.8	58.75	5.728	26.025	4.826	1.0005	4.3305	0.529	3.6505	0.6055	2.0625	0.274	2.011	0.28
Michigan	MI41N	8.75	1947.78	0.01815	5627.03	20628.7	14829.7	940.42		8948.9	1464.3	197.857	1189.03	4612.33	77.3457	12.515	97.79	89.7	16.29	52.565	75.36	360.15	19.505	14.415	114.45	111.85	20.28	110.85	10.46	1.4185	3.583	10.585	2.153	5.502	495.55	30.475	62.165	6.056	27.4	5.128	1.0665	4.61	0.5575	3.785	0.6315	2.181	0.2845	2.117	0.291
Michigan	MI41N	9.75	1936.12	0.01855	5957.93	11141.3	17133.7	987.607		7316.93	1664.57	196.253	2055.2	4642.67	72.834	13.555	106.2	83.64	16.4	47.52	69.315	278.2	21.245	12.745	124.45	112.7	21.22	115.7	11.345	1.0475	3.1455	7.184	2.0715	5.904	525.35	32.415	67.065	6.5405	29.605	5.5195	1.139	4.869	0.576	4.018	0.676	2.3215	0.3045	2.284	0.317
Michigan	MI41N	10.75	1924.08	0.018275	5294.33	10421.3	12218	958.24		6933.23	555.25	187.527	487.077	4338.2	67.062	14.51	114.15	82.765	16.19	50.365	67.96	227.25	21.59	10.37	132.5	114.85	22.235	121.35	11.81	0.898	2.523	5.5155	1.6475	6.0445	555.05	33.925	70.1	6.7945	30.265	5.6685	1.188	5.066	0.6015	4.1715	0.6945	2.43	0.316	2.402	0.333
Michigan	MI41N	11.75	1912.12	0.0202	5255.9	10900.7	11494.7	959.73		7410.7	419.787	184.43	298.323	4281.73	66.42	14.41	116.25	83.64	28.985	47.945	55.2	165.95	21.665	8.587	137.1	116.5	23.305	122.05	8.2835	0.9715	1.7335	3.4465	1.1445	6.1625	570.95	35.25	72.605	7.0725	31.615	5.8685	1.214	5.2275	0.6275	4.384	0.7215	2.516	0.327	2.4395	0.336
Michigan	MI41N	12.75	1902.3	0.027175	5660.37	11815	12792.7	997.437		8301.73	429.27	195.54	310.973	4511.83	68.517	15.1	115.5	78.405	15.75	45.41	45.46	122.15	21.565	7.436	137.85	118	23.115	123.15	11.55	0.8985	0.7935	2.914	0.691	6.131	575.6	35.01	73.005	7.0815	31.745	5.8995	1.23	5.3195	0.6255	4.3385	0.722	2.5345	0.3385	2.456	0.341
Michigan	MI41N	13.75	1894.1	0.0311	5694.9	11010.7	11391.3	1040.63		7829.83	394.737	199.21	298.023	4449.83	70.8167	15.135	115.25	79.95	24.425	47.265	46.065	110.8	21.88	9.3305	140.75	118.6	22.945	124.05	11.665	1.09	0.566	2.5375	0.5215	6.1415	593.5	35.46	73.71	7.189	32.55	5.9805	1.234	5.259	0.629	4.35	0.7265	2.5325	0.333	2.484	0.347
Michigan	MI41N	14.75	1885.82	0.0321667	5401.43	11609.7	11434.7	999.917		8025.37	526.603	198.67	436.933	4270.4	70.752	14.765	115.1	79.04	16.515	49.86	44.05	107.85	21.99	7.8305	140.55	118.65	23.155	124.45	13.28	1.2355	0.486	2.5255	0.4905	6.219	573.8	35.13	72.16	7.095	31.775	5.9065	1.227	5.3125	0.633	4.386	0.727	2.5395	0.3345	2.482	0.3505
Michigan	MI41N	16.5	1867.5	0.0234	5615.2	12276	11297.3	985.27		8575.03	546.04	196.49	331.7	4221.13	67.589	15	112.45	237.15	643.25	68.24	50.805	104.9	21.46	7.5985	137.3	116.35	22.91	122.8	12.105	1.0165	0.408	2.449	0.4445	6.136	557.1	34.58	71.76	7.0135	31.505	5.886	1.2075	5.168	0.6235	4.3095	0.716	2.5065	0.329	2.4465	0.3465
Michigan	MI41N	18.5	1843.05	0.02025	5924.3	11500.3	14318.3	1032		8289.1	1028.87	208.25	798.49	4674.53	72.3067	14.74	114.1	78.585	16.885	47.45	43.355	106.4	21.765	7.6205	135.9	116	22.52	120.7	11.48	0.7495	0.41	2.4	0.4475	6.0975	558.25	34.645	71.375	6.982	31.285	5.8025	1.1955	5.1815	0.6115	4.214	0.7105	2.476	0.3225	2.378	0.3365
Michigan	MI41N	20.5	1817.78	0.0189	5399.1	10670	11572.7	937.75		7718.3	560.103	191.607	396.863	4107.43	65.607	15.075	114.3	79.055	65.705	52.035	42.92	105.4	21.585	8.222	138.15	117.55	22.54	117.75	11.825	0.8375	0.415	2.212	0.4675	6.1645	561.2	34.9	71.635	7.0065	31.7	5.878	1.2005	5.2325	0.621	4.321	0.7155	2.4905	0.3325	2.435	0.342
Michigan	MI41N	22.5	1792.38	0.0189	4914.57	10025	12219.3	942.177		6978.07	884.63	188.26	769.8	4227.7	66.799	14.5	112.4	78.645	135.7	51.23	41.625	102.1	21.35	8.2445	133.15	115.1	21.77	118.25	11.26	0.8785	0.3885	2.342	0.4345	6.1635	556.05	33.35	68.6	6.747	30.495	5.669	1.1745	5.006	0.593	4.1765	0.6885	2.409	0.3155	2.3825	0.3295
Michigan	MI41N	24.5	1766.98	0.0189	5593.93	11811.3	12553	1011.17		8310.27	636.07	201.72	387.8	4513.1	70.1807	14.235	109.35	75.42	17.455	48.655	42.52	100.46	20.89	9.106	132.75	113.45	21.605	117.35	11.08	0.882	0.386	2.3015	0.434	6.0075	544.05	33.725	69.37	6.808	30.56	5.6315	1.184	5.036	0.5995	4.16	0.694	2.4215	0.314	2.339	0.3275
Michigan	MI41N	26.5	1741.58	0.0189	5777.73	13426.7	12181.3	1002.72		9315.57	802.347	198.673	444.907	4387.43	68.9393	14.515	110.65	76.165	16.7	47.145	40.995	101.9	21.18	9.154	135.65	115.6	22.465	120.7	11.28	0.797	0.3945	2.2785	0.4105	5.989	551.05	34.2	69.985	6.8915	30.895	5.6995	1.1945	5.089	0.6095	4.232	0.699	2.42	0.3275	2.376	0.3315
Michigan	MI41N	28.5	1716.18	0.0189	4738.73	11586.3	11794.3	904.89		7831.13	1067.33	182.88	565.477	4152.6	67.1617	15.035	113.5	78.925	19.71	53.585	43.355	105.9	21.71	8.735	137.4	116	22.77	122.4	11.615	0.7865	0.397	2.486	0.4325	6.2465	561.25	35.03	72.005	7.0895	31.495	5.9425	1.224	5.2295	0.625	4.3615	0.7185	2.483	0.3265	2.46	0.342
Erie	ERW	0.25	2011.95	0.275	6982.23	27648.7	21363.3	1020.5		13465.7	1549.37	9526.2	547.827	6405.07	78.341	13.1525	129.2	100.42	15.965	55.99	44.6725	202.825	18.2025	10.7675	130.65	146.55	17.3425	121.45	12.185	1.6055	1.5985	5.05525	0.9085	5.96125	408.875	32.44	68.1825	7.6565	29.265	5.43525	1.09125	4.7955	0.66275	3.9365	0.75875	2.30625	0.33425	2.2565	0.3285
Erie	ERW	1.75	2009.93	0.262531	8066.1	24042.3	19625.7	956.06		15555	592.997	1303.6	514.607	6232	75.6857	13.925	136.55	107.25	16.49	59.83	46.58	209.75	19.735	8.31	136.2	123.3	25.37	143.65	14.03	1.708	1.7025	5.454	0.871	6.3345	434.25	37.315	78.16	8.7895	33.615	6.352	1.306	5.5665	0.79	4.683	0.892	2.6475	0.387	2.594	0.38
Erie	ERW	3.25	2008.17	0.247569	7100.53	21633.7	17559.3	865.42		13752	451.96	764.803	475.777	5177.73	70.1297	14.56	142.65	110.25	23.09	67.65	49.745	225	21.085	7.595	145.25	124.6	25.685	149.1	14.545	1.7225	1.923	5.777	0.873	6.6905	451.8	38.36	78.495	8.9475	34.52	6.5215	1.332	5.7895	0.7985	4.748	0.905	2.741	0.387	2.5935	0.3825
Erie	ERW	4.75	2006.21	0.235119	7558.5	23042	19524	901.523		14992.7	497.303	645.42	449.14	5521.7	71.4443	14.63	140.35	114.7	26.19	65.86	54.595	244.2	20.23	8.1595	140.65	122.3	25.46	135.3	14.07	1.5985	2.159	5.9905	1.01	5.7385	445.35	37.87	79.55	8.8755	33.545	6.422	1.3175	5.699	0.7935	4.6875	0.8945	2.685	0.3855	2.607	0.375
Erie	ERW	6.25	2003.29	0.235231	7085.87	23785	18488.7	858.59		15304.3	458.19	524.093	448.8	5140.93	71.213	14.7	142.55	116.1	28.03	64.33	51.44	230.55	20.215	7.464	142.7	130.15	26.015	149.05	14.66	1.431	1.971	5.9505	0.922	6.5245	464.95	38.9	82.645	9.3925	35.775	6.7715	1.367	5.9575	0.8275	4.8275	0.9355	2.817	0.407	2.6985	0.3915
Erie	ERW	7.75	2000.36	0.235344	8005.1	22175	19878.7	953.75		14545.7	474.087	441.78	451.853	5678.17	72.9063	14.875	141.95	112.75	17.195	65.69	49.445	230.4	20.975	7.3075	144.15	128	25.415	145.65	14.465	1.7305	1.985	6.0425	0.939	6.7655	464.9	38.585	80.895	9.2545	35.64	6.6875	1.3495	5.8565	0.81	4.7045	0.906	2.782	0.3965	2.6915	0.3915
Erie	ERW	9.25	1997.31	0.23432	6487.23	24377.7	16893	804.683		15434.3	416.317	365.07	428.52	5112.3	73.6293	13.07	123.05	101.55	15.445	58.71	47.865	216.6	18.78	6.963	125	128.75	23.545	144.15	13.655	1.565	1.998	5.473	0.775	5.7565	432.4	35.135	72.53	8.3735	31.88	6.09	1.25	5.3235	0.741	4.3495	0.829	2.4965	0.3595	2.452	0.3595
Erie	ERW	10.5	1994.66	0.23252	5149.07	23679.3	14403.7	657.513		15332	315.167	593.84	406.007	4452.63	76.7867
Erie	ERW	11.5	1992.41	0.227325	6394.1	23539.7	16296	778.27		14839.3	404.233	293.703	423.677	5019.03	70.734	13.195	127.7	105.65	15.53	59.735	48.83	227.55	19.04	7.605	128.75	128.3	23.71	139.7	13.795	1.464	2.0435	5.6345	0.8045	5.8415	435.9	35.535	74.62	8.6405	33.025	6.2745	1.2835	5.5105	0.7595	4.4375	0.8505	2.572	0.3705	2.504	0.365
Erie	ERW	12.5	1990.04	0.218375	5342.6	23963	13714.7	648.817		15452	308.82	494.837	397.67	4448.2	78.191
Erie	ERW	13.5	1987.66	0.209425	7764.27	22015.7	19060.7	869.563		14341	452.443	284.22	458.663	5427.13	74.2457	14.925	139.25	116.55	17.125	68.31	53.14	250.3	20.775	8.1265	142.7	131.75	25.71	143.9	14.53	1.497	2.2085	6.3415	0.919	7.7285	464.3	38.795	81.14	9.358	36.885	6.75	1.3575	5.8815	0.813	4.8215	0.9225	2.7905	0.399	2.6485	0.3885
Erie	ERW	14.5	1985.29	0.200475	5346.87	26907	14168.3	657.51		16980.3	380.61	414.747	408.877	4630.93	83.0767
Erie	ERW	15.5	1982.84	0.198425	7776.03	21148.7	18806	855.03		13790	408.93	245.757	450.903	5437.93	76.3883	14.305	137.35	125.9	32.16	69.56	56.455	244.85	20.09	7.8035	137.7	129	25.8	151.65	14.385	1.4025	2.389	6.545	0.9435	6.423	459.5	37.645	77.85	9.028	34.59	6.545	1.321	5.7155	0.805	4.787	0.916	2.756	0.3955	2.67	0.387
Erie	ERW	17.5	1977.79	0.208125	7424.23	22064.7	18056.3	805.183		14256.7	383.923	209.213	477.21	5206.9	76.5583	13.675	135.45	119.7	16.515	71.075	57.095	261.95	19.905	8.905	136.25	132.7	25.435	155	14.385	1.699	2.4995	6.656	0.9685	6.1385	452.4	36.41	75.485	8.7785	33.64	6.3975	1.2955	5.667	0.775	4.6025	0.8865	2.6795	0.3875	2.597	0.381
Erie	ERW	20.5	1970.17	0.213675	7238.77	22203.7	17703.3	788.243		14309.7	376.477	182.287	479.483	5228.13	80.667	13.76	131.55	121	16.51	76.63	59.81	262.35	19.615	9.527	132.45	134	24.785	152.45	14.2	1.607	2.7755	6.892	1.144	6.112	456	36.32	75.165	8.817	34.68	6.443	1.318	5.614	0.7785	4.5905	0.8725	2.652	0.381	2.5925	0.377
Erie	ERW	22.5	1964.78	0.2014	7066.53	22221.7	17440.3	758.973		14165.3	372.39	175.313	490	5079.3	81.9757	13.4	126.15	121.7		4127	424.55	252.2	19.065	10.54	130.1	133.6	24.51	147.85	19.07	2.409	2.8235	7.164	1.1845	5.6815	451.1	35.88	73.59	8.619	33.51	6.3345	1.287	5.611	0.785	4.6015	0.8685	2.639	0.377	2.5615	0.367
Erie	ERW	25.5	1957.08	0.256025	6632.03	24263.3	16444.7	725.347		15309.7	379.583	158.007	485.57	5031.9	83.028	12.445	114.3	129.75	453.95	71.945	54.855	212.4	17.72	9.0035	117.25	133.55	24.19	160.95	13.875	1.4915	2.4735	6.207	1.0045	5.0555	425.6	33.555	68.935	8.128	31.135	6.002	1.2425	5.3315	0.745	4.3955	0.8555	2.559	0.363	2.4715	0.3575
Erie	ERW	28.5	1950.7	0.373475	5717.37	27061	14087.7	677.12		16803	352.343	147.533	456.743	4993.83	81.8237	11.58	103.55	75.16	13.725	45.89	41.145	160.5	16.135	7.1965	107.25	138.25	23.45	169.1	13.865	1.116	1.7085	4.189	0.773	5.446	426.95	34.065	70.39	8.1785	31.895	6.249	1.2555	5.3905	0.7475	4.3995	0.845	2.5665	0.3665	2.4655	0.359
Erie	ERW	31.5	1943.65	0.282425	5584.03	27502.7	13932.3	665.49		16970	374.703	144.33	436.023	4794.17	81.9557	11.485	104.2	71.405	13.65	42.29	39.55	153.1	16.575	7.9715	108.65	135.45	23.13	161.25	13.63	1.098	1.195	3.685	0.69	4.3255	412.65	32.105	66.555	7.926	30.855	5.9035	1.212	5.1355	0.7345	4.2575	0.8125	2.429	0.35	2.3335	0.3435
Erie	ERW	33.5	1937.83	0.239725	6007.43	26119.3	15465.3	728.833		16271.7	442.76	146.123	431.417	4957.03	82.0327	12.29	114.8	73.02	15.245	45.865	44.415	166.05	17.5	9.1915	117.5	128.7	23.73	138.85	14.05	1.133	1.0825	4.1685	0.6985	4.957	422.6	34.01	70.115	8.228	31.52	6.1865	1.242	5.3305	0.7455	4.402	0.8395	2.4865	0.3585	2.442	0.347
Erie	ERW	35.75	1930.15	0.2339	5528.5	27470.3	13049.3	661.61		17095.3	382.48	141.15	412.73	4654.93	79.7873	11.825	108.05	83.96	64.8	40.68	35.535	146.4	16.595	8.4245	111.05	136.5	23.385	160	14.285	1.132	0.742	3.472	0.577	4.656	427.7	33.99	70.12	8.283	31.77	6.1275	1.2605	5.3765	0.7545	4.318	0.833	2.495	0.3615	2.434	0.3565
Erie	ERC	0.25	2011.8	0.1767	8984.87	12890	21597.3	1199.3		7890.1	756.213	5120.43	608.613	5929.3	78.033	15.95	157.55	101.06	19.705	59.695	44.66	210.85	23.345	15.125	160.7	145.35	24.9	114.6	14.09	1.46	1.3105	4.851	1.0575	7.502	483.2	38.865	79.6	9.17	34.705	6.4695	1.2805	5.4665	0.769	4.566	0.8915	2.6915	0.388	2.594	0.3735
Erie	ERC	1.75	2009.01	0.174231	9698.63	9540.13	21570	1238.27		7986.83	496.343	1852.8	720.09	6165.07	81.3417	16.725	163.55	105.55	20.165	64.33	48.565	219.25	24.54	11.9	160.85	127.3	29.995	121.55	15.16	1.5015	1.6605	4.9045	1.251	10.65	507.15	45.41	91.125	10.85	41.935	7.9295	1.6165	7.119	0.9855	5.6165	1.0745	3.1445	0.453	2.9695	0.4315
Erie	ERC	3.25	2006.49	0.171269	8126.47	8193.63	18616	1123.2		6641.07	372.007	1088.13	599.973	5650.93	76.7253	17.36	171.95	112.2	20.8	67.05	49.245	232.95	25.84	11.36	169.6	121.05	27.995	127.3	15.385	1.821	1.4365	5.4495	1.277	8.873	530.85	43.55	89.415	10.315	39.18	7.3015	1.481	6.537	0.8975	5.4185	1.013	3.046	0.4385	3.054	0.425
Erie	ERC	4.75	2003.82	0.167125	8339.9	7786.3	19745.7	1140.4		6562.8	367.677	838.203	542.363	6026.3	77.1397	17.355	170.2	117	29.225	68.6	51.955	248	25.475	11.765	170.7	122.8	28.195	129.25	15.545	1.8255	1.519	5.5935	1.3045	8.104	518.7	43.125	88.7	10.275	38.88	7.369	1.484	6.476	0.8965	5.199	0.9985	3.01	0.429	2.962	0.419
Erie	ERC	6.25	2000.33	0.157075	9242.4	7439.2	21633	1165.73		6722.2	352.51	631.23	485.193	6133.7	75.2883	17.52	173.6	118.85	21.25	69.785	52.425	265.65	26.04	10.895	178.65	127.45	28.405	130.85	15.635	1.9235	1.653	5.9155	1.3365	8.338	540.1	44.06	90.94	10.575	40.205	7.53	1.516	6.4825	0.9075	5.3345	1.033	3.178	0.4365	3.022	0.4345
Erie	ERC	7.75	1996.84	0.147025	10235.8	7848.37	24796	1221.7		7453.37	377.96	529.647	530.887	6488.57	75.747	17.595	173.35	134.75	407.95	78.57	59.765	295.45	25.795	11.495	171.1	125.55	28.58	129.75	15.53	1.858	2.223	6.421	1.5655	9.121	528.9	43.6	89.42	10.285	40.04	7.429	1.5	6.455	0.9185	5.2935	1.0135	3.083	0.4415	2.982	0.425
Erie	ERC	9.25	1993.18	0.13711	9576.03	7560.4	23287.3	1134.6		6787.57	380.357	552.133	605.313	6293.07	74.239	17.075	169.95	121.2	21.165	72.355	56.565	289.95	25.515	12.425	173.55	128.5	28.17	126.5	15.47	1.855	2.0395	6.562	1.5005	8.4945	516.55	42.415	87.375	10.195	39.715	7.313	1.4735	6.3815	0.9175	5.2145	0.991	3.0535	0.431	2.89	0.419
Erie	ERC	10.5	1989.98	0.12896	9857.63	8007.57	22410.7	1134.13		7089.73	357.323	397.623	521.443	6331.5	74.4997
Erie	ERC	11.5	1987.28	0.1228												17.19	172.8	124.5	20.415	74.155	60.18	305.15	25.39	13.83	174.15	126.05	28.155	130.2	15.485	2.23	2.5215	6.654	1.7075	8.5315	521.75	43.27	88.68	10.19	39.23	7.3405	1.476	6.482	0.8925	5.2695	1.006	3.02	0.432	2.9105	0.4245
Erie	ERC	14.5	1978.72	0.1054	9909.6	7764.1	22052.3	1126.2		6902.6	376.413	343.823	584.643	6420.3	79.2347	16.6	171.25	130.35	20.18	75.72	62.605	321.85	24.575	16.295	164.45	121.9	28.24	133.1	15.28	2.447	2.979	7.2445	1.8725	7.3625	496.8	41.215	84.98	9.9025	38.395	7.2715	1.472	6.4015	0.8845	5.341	1.013	3.0445	0.4325	2.8995	0.421
Erie	ERC	17.5	1969.4	0.0944125	10733.7	7712.1	23587.7	1174.17		7109.7	431.847	266.383	614.46	6643.17	79.9987	17.41	175.95	137.5	21.93	82.26	65.585	363.4	25.72	20.465	177.6	125.45	28.31	127.25	15.565	2.669	3.2615	8.0585	1.971	9.071	527.9	43.6	90.27	10.48	40.065	7.5425	1.5105	6.581	0.9055	5.3375	1.0215	3.0825	0.447	2.947	0.4365
Erie	ERC	20.5	1959.8	0.0896875	9233.37	8052	23400.3	1100.57		6910.23	486.35	305.333	802.74	6466.73	92.7243	16.175	163.1	139.75	20.575	81.91	76.58	428.75	24.6	24.905	163.3	122.75	27.55	129.05	14.665	2.708	3.7225	8.6045	2.281	8.417	494.3	41.475	85.45	10.02	38.755	7.3705	1.4745	6.379	0.889	5.1965	0.9925	3.0165	0.426	2.8485	0.417
Erie	ERC	23.5	1949.22	0.07715	9959.3	8060.73	24829.7	1137.03		7147.33	552.843	229.8	833.877	6513.3	90.895	17.095	170.45	146	23.585	77.65	73.725	443.5	25.565	24.47	171.1	123.6	29.4	138.6	15.22	1.611	3.608	9.04	2.147	7.8235	512.7	43.055	90.06	10.45	40.72	7.7075	1.528	6.6505	0.93	5.6205	1.061	3.1945	0.4585	3.0525	0.441
Erie	ERC	26.5	1938.09	0.0904625	9053.33	5828.5	22249	1047		5801.1	387.187	195.41	551.07	5899.83	82.0753	16.85	167.05	119.6	20.485	68.26	64.48	319.55	25.42	18.045	172.45	125.05	28.635	132.15	15.195	2.2805	2.602	8.2795	2.3655	8.4255	524.35	43.41	89.045	10.435	40.22	7.5285	1.519	6.618	0.9265	5.3705	1.029	3.091	0.4435	2.9685	0.434
Erie	ERC	29.5	1927.22	0.101362	9297.9	6819.1	22011.7	1100.93		6379.43	402.717	205.277	482.307	6219.67	80.641	17	167.25	99.54	21.105	61.19	55.25	256.1	25.47	14.65	172.55	124.75	28.64	135.05	15.47	2.241	1.612	6.8725	1.9955	11.31	530.35	43.99	90.345	10.65	41.46	7.791	1.5605	6.713	0.9345	5.513	1.065	3.1655	0.461	3.014	0.448
Erie	ERC	32.5	1917.17	0.113138	8532.57	6099.73	19922.3	1084.57		5731.83	400.027	183.157	494.813	5988.53	82.5337	17.255	166.65	94.89	19.855	56.705	50.05	226	25.215	14.24	178.4	124.4	28.18	133.05	15.265	1.6755	1.3005	6.293	1.8195	8.962	520.7	42.665	86.485	10.34	39.75	7.402	1.51	6.6005	0.9295	5.331	1.017	3.0525	0.4515	2.922	0.433
Erie	ERC	35.5	1906.88	0.105225	9787.33	5281.1	22661	1148.8		5781.53	441.847	209.75	482.643	6375.77	80.923	17.615	168.4	96.285	20.04	56.145	46.03	206.2	25.955	13.745	185.85	123.5	29.025	132.3	15.46	1.882	1.0665	5.649	1.667	8.4555	540.15	43.205	88.505	10.675	41.29	7.7445	1.58	6.709	0.9455	5.461	1.0495	3.22	0.471	3.046	0.4475
Erie	ERC	38.5	1895.44	0.0907125	9735.37	4894.47	22715.3	1096.8		5268.8	493.467	180.71	443.43	6251.43	77.7567	16.96	169.15	96.63	19.655	56.24	42.375	183.95	25.915	15.09	190.05	117.3	27.335	124.6	14.44	2.4265	0.8745	5.1245	1.0825	7.6925	536.55	42.25	84.73	10.225	39.39	7.337	1.4855	6.4055	0.908	5.2575	1.0165	3.0595	0.438	2.9575	0.428
Erie	ERC	41.5	1889.17	0.082125	8114.97	4618.3	18454	1029		4782.4	390.217	171.14	451.973	5562.93	79.372	18.18	181.15	107.1	55.39	58.575	42.92	170.45	26.715	13.015	253.5	128.75	30.535	138.85	15.995	1.651	0.6525	4.89	0.939	9.6305	549.1	46.295	90.385	10.93	41.27	7.9105	1.616	6.7335	1.0015	5.6965	1.148	3.269	0.4995	3.064	0.4685
Erie	ERC	44.5	1883	0.082125	9052.37	4639.73	26122.7	1044.43		5332.33	675.667	221.61	816.283	6398.07	80.969	18.42	178.5	104.75	1499.5	787.55	292.65	167.2	27.645	17.265	304.75	129.45	33.165	145.3	63.525	6.9175	0.5795	6.5445	1.621	8.625	581.35	50.12	98.45	11.51	43.685	8.0565	1.663	7.1445	1.065	5.8995	1.1365	3.4015	0.4545	3.304	0.434
Erie	ERC	46.5	1876	0.082125	8836.8	4275.1	25298	1028.8		5008.23	705.667	196.277	867.757	6250.6	80.1277	16.79	173.5	100.43	28.315	70.29	46.995	168.2	25.76	15.445	265.9	127.8	30.66	142.5	16.47	1.8235	0.601	3.82	0.788	9.4925	567	49.3	97.5	11.615	45.485	8.589	1.942	7.4515	1.164	5.826	1.229	3.3995	0.525	3.23	0.535
Erie	ERC	48.5	1870	0.082125	9160.73	4430.1	21017.3	1097.37		5352.97	571.85	166.217	610.947	6374.3	86.7707	16.27	162.3	93.66	19.825	53.09	38.625	141.85	25.43	15.295	268.6	116.5	27.71	126	14.965	2.5545	0.4295	3.355	0.5985	7.7105	510	42.4	83.5	9.9265	38.145	7.265	1.491	6.152	0.942	5.0125	1.004	2.9515	0.4335	2.805	0.3865
Ontario	ONW	0.5	2012.55	0.0206	8208.77	7309.63	18520	1032.2		4668.27	7497.07	355.403	661.84	5356.2	88.5597	16.185	150.15	124.2	23.71	147.5	160.6	499.45	24.35	52.015	126.95	170.2	29.8	132.65	14.19	8.768	4.079	10.33	2.163	7.2765	738.65	41.375	85.395	9.8715	38.065	7.331	1.4655	6.489	0.8835	5.306	1.0175	2.998	0.423	2.8385	0.4045
Ontario	ONW	1.75	2008.1	0.0208625	7613.27	6394.97	16621	998.293		4051.5	9102.3	264.43	524.163	5378.97	90.2863	16.995	154.65	129.65	173.2	152.45	158.05	524.75	25.75	50.455	153.75	177.8	32.345	135.55	14.67	11.11	4.043	10.215	2.1505	8.0795	836.9	44.405	92.325	10.605	41.18	7.668	1.546	6.6495	0.906	5.347	1.024	3.022	0.424	2.913	0.406
Ontario	ONW	2.75	2003.7	0.0212125	6769.17	6611.27	19128	947.013		3539.57	15382	234.923	739.833	5520.53	88.556	16.23	146	119.25	28.43	177.75	150.35	501.2	24.255	128.8	145.4	170.35	29.77	125.8	13.555	9.839	3.701	10.046	2.2395	7.0285	1113	42.865	88.505	10.17	39.065	7.364	1.498	6.436	0.8675	5.1535	0.987	2.9395	0.41	2.741	0.394
Ontario	ONW	3.75	1997.24	0.0202875	7882.77	5967	22441.3	1033.37		4231.8	1980.57	229.51	1494.83	5106.27	84.1123	16.825	152.45	126.25	23.39	146.6	158.9	560.85	25.055	88.1	149.55	164.05	30.58	128.6	14.45	2.479	4.6685	10.785	2.5585	8.2445	800.65	45.04	92.515	10.755	41.075	7.7855	1.571	6.7525	0.9125	5.4065	1.031	3.0215	0.4255	2.8765	0.4175
Ontario	ONW	4.75	1990.09	0.0189375	7786.63	17736	15883	1053.63		5102.73	1318.1	221.37	739.72	5109.4	87.744	16.7	149.1	133.75	40.735	137.15	1445	623.2	24.94	23.915	149.25	169	30.865	132.95	14.32	2.0715	4.6085	11.575	2.4485	7.6155	689.6	44.625	93.17	10.71	41.8	7.7205	1.5515	6.6665	0.8945	5.3315	1.0205	2.996	0.422	2.838	0.4055
Ontario	ONW	5.75	1982.6	0.023625	7695.6	66925	14531	980.797		5099.43	1134.23	211.287	573.837	5232.7	93.4373	13.795	126.7	116.5	17.305	111.6	52.635	594	21.155	14.77	124.5	210.95	25.44	109.65	11.08	1.4705	5.041	9.645	2.3365	7.193	542.95	36.525	75.36	8.681	33.29	6.3095	1.266	5.442	0.7325	4.391	0.828	2.4455	0.345	2.298	0.329
Ontario	ONW	6.75	1975.9	0.029575	7700.3	56074.7	14661.3	995.747		4662	1178.23	210.31	578.243	5176.13	93.3507	14.675	130.25	132.05	18.265	106.9	142.05	616.4	22.575	18.25	133.95	204.7	27.38	122.35	12.835	1.6215	5.34	11.475	2.5805	7.035	577.35	39.915	83.33	9.557	37.28	6.931	1.395	5.9745	0.822	4.873	0.926	2.76	0.3865	2.5965	0.371
Ontario	ONW	7.75	1969.12	0.0289	9048.3	29378.3	17905.7	1076.93		5022.9	1197.3	213.64	623.283	5418.9	91.687	16.375	144.9	140.45	21.31	111.7	148.45	659.15	25.135	24.825	149.25	177.8	30.11	127.85	10.775	1.705	4.523	11.96	2.6395	7.14	617.55	43.55	91.005	10.425	40.405	7.5145	1.5215	6.5675	0.8855	5.251	1.003	2.9655	0.4165	2.805	0.411
Ontario	ONW	8.75	1962.15	0.030825	9400.83	15060.7	17734.7	1159.4		4884.4	957.04	211.807	584.543	5654.87	89.0773	17.75	155.1	136.15	52.8	104.145	149.95	543.8	26.93	22.645	162.1	168.7	31.37	128.45	14.885	1.8505	3.6825	11.345	2.158	8.0855	652.9	46.015	96.81	11.01	41.985	8.017	1.5995	6.88	0.94	5.587	1.0455	3.1105	0.443	2.9425	0.423
Ontario	ONW	9.75	1954.17	0.03035	9595.67	5940.77	18910	1190.27		4756.93	968.653	210.053	555.097	5624.7	84.563	18.65	163.65	131.75	24.785	112.9	136.4	558.7	28.65	24.685	173.05	164.45	33.495	136.8	15.71	1.8345	3.657	10.53	1.9835	8.3745	705.5	49.13	104.8	11.83	45.255	8.5655	1.704	7.3255	0.996	5.901	1.1215	3.3235	0.4725	3.177	0.456
Ontario	ONW	10.75	1945.05	0.030125	9555.6	4104.13	23328.3	1111.3		4466.03	1654.2	194.07	1205.03	5523.7	79.1443	17.185	163.5	118.3	24.35	90.62	115.5	405.65	27.93	21.815	136.4	154.75	29.425	140.1	15.71	2.0585	2.386	9.3565	1.552	8.3475	674.2	40.16	90.12	10.315	40.73	7.589	1.5335	6.5865	0.9065	5.4045	1.0345	3.101	0.4385	2.971	0.4235
Ontario	ONW	11.75	1935.88	0.032225	8528.5	3704.3	30345.7	1026.23		4179.9	4272.23	179.317	3386.53	5532	83.2087	17.92	155.2	98.6	21.985	65.67	78.965	245.4	26.06	17.25	161.7	150.85	30.315	126.6	14.355	1.1155	1.3185	5.925	1.211	8.9745	638.05	47.815	94.535	10.685	40.925	7.7955	1.5575	6.71	0.9	5.3645	1.015	3.0635	0.428	2.8815	0.4175
Ontario	ONW	12.75	1928.05	0.04325	9071.03	3566.6	24716	1115		4449.03	1458.37	176.527	1271.83	5610.83	72.5823	18.68	164.4	238.2	2613	89.16	568.6	182.1	27.19	14.255	174.15	155.75	31.915	122.55	14.55	1.2705	0.664	4.0975	1.0165	7.8555	661.35	46.675	98.14	11.32	42.925	8.1035	1.624	7.042	0.9385	5.624	1.0725	3.169	0.4475	3.0435	0.4375
Ontario	ONW	13.75	1922	0.054875	9590.53	3594.4	21992.7	1177.53		4845.77	618.83	197.393	474.747	5727.7	75.5013	20.74	165.45	98.93	33.34	69.775	75.64	157.1	27.195	12.06	173.45	159.45	31.965	124.4	15.065	1.276	0.675	3.2355	0.754	7.9985	675.3	43.485	98.065	11.415	44.165	8.414	1.6975	7.145	0.971	5.7605	1.0935	3.237	0.462	3.087	0.444
Ontario	ONW	14.75	1916.85	0.055875	9329	3556.97	21011.7	1179.2		4755.9	539.71	201.26	442.62	5732.53	74.5223	18.655	161.25	95.93	20.915	65.815	67.205	145.75	26.165	12.34	172.55	158.6	32.875	123.45	13.705	1.125	0.382	3.146	0.601	8.2045	689.05	47.965	98.825	11.575	45.485	8.5365	1.711	7.289	0.9915	5.9435	1.1245	3.345	0.47	3.167	0.461
Ontario	ONW	16.5	1907.65	0.05845	9172.8	3398.6	19061.3	1152		4614.67	498.453	192.83	391.823	5599.63	76.0333	18.53	163.7	95.28	19.45	62.985	70.54	147.9	26.75	21.12	172.6	158.95	32.3	122.6	14.065	1.1995	0.4485	3.3045	0.569	8.1905	678.9	47.025	96.23	11.405	44.05	8.3215	1.681	7.1925	0.9695	5.794	1.0995	3.2435	0.4635	3.114	0.445
Ontario	ONW	18.5	1897.2	0.061225	8686.57	3344.03	16424.7	1174.93		4493.97	447.31	196.947	358.903	5209.97	77.6313	18.745	164.1	95.385	18.575	58.255	78.185	149.7	26.94	25	172.85	157.45	32.065	121.25	14.08	1.099	0.6665	3.16	0.6205	8.4115	658.95	47.315	96.565	11.36	43.705	8.343	1.6655	7.067	0.966	5.6905	1.087	3.2115	0.453	3.0805	0.4425
Ontario	ONW	20.5	1888.08	0.077775	9554.5	3316.1	23302	1172.2		4827.97	887.31	193.127	1389.8	5816.3	85.0067	17.765	157.65	95.5	36.66	67.875	66.53	146.55	26.255	56.125	169.65	154.85	31.445	121.5	13.915	0.9695	0.6225	2.7705	0.58	8.244	633.5	46.345	94.085	11.13	42.615	8.175	1.663	7.095	0.9515	5.6535	1.0765	3.1935	0.4485	3.005	0.4335
Ontario	ONW	22.5	1879.38	0.075525	9283.3	3420.1	19626.7	1143.97		4720.43	460.36	192.067	367.453	5593.4	73.5017	18.665	161.55	96.185	20.27	67.71	64.14	142.6	26.855	11.405	178.2	162.85	32.87	122.75	14.16	2.6205	0.2915	3.0985	0.5475	8.5605	687.85	48.01	98.39	11.665	45.195	8.491	1.7095	7.306	0.9935	5.879	1.1265	3.3495	0.4715	3.2035	0.46
Ontario	ONW	25.5	1851.8	0.029025	9663.43	3225.83	18997.7	1195.8		4868.93	467.357	192.82	435.26	5857.13	82.0937	18.69	160.15	94.98	21.85	60.61	67.865	144.5	26.72	42.745	173.65	158.95	32.525	122.55	14.265	1.07	0.5315	3.0525	0.656	7.816	664.1	48.635	98.22	11.71	45.325	8.5055	1.725	7.3355	0.997	5.911	1.121	3.3475	0.4715	3.187	0.4595
Ontario	ONW	28.5	1819.51	0.0366	9887.67	3261.83	20883.7	1210.1		4987.27	468.153	201.583	398.843	6128.43	83.916	17.75	156.3	92.615	669.2	440.6	127.3	141.15	26.04	51.07	171.35	151.9	31.52	116.45	28	2.516	0.182	3.367	0.638	7.5585	645	46.34	93.61	11.295	43.335	8.2565	1.553	6.9735	0.849	5.614	0.9725	3.109	0.34	2.9975	0.329
Ontario	ONW	31.5	1787.11	0.0366	9347.9	3133.47	18489.3	1134.27		4710.1	407.973	191.85	380.057	5564.9	80.906	18.17	157.8	92.95	20.295	55.485	66.125	141.95	26.875	57.245	173.15	157.55	31.765	119.45	14.09	1.0605	0.4155	3.3095	0.5935	8.226	648.05	47.59	95.415	11.475	43.83	8.3315	1.691	7.109	0.967	5.7945	1.1	3.244	0.4605	3.095	0.4455
Ontario	ONW	34.5	1754.71	0.0366	9681.63	3197.97	21776	1146.97		4875	696.277	199.137	822.633	5836.13	84.285	18.515	158.25	93.605	22.065	64.555	64.03	144.15	26.745	16.975	172.9	159.15	32.22	122.9	14.12	2.152	0.4635	3.0455	0.5885	8.136	667.05	47.96	94.84	11.51	44.545	8.485	1.715	7.2845	0.9885	5.8525	1.112	3.3095	0.473	3.1755	0.462
Ontario	ONW	37.5	1722.31	0.0366	9094.23	3129.77	18129.3	1132.87		4598.67	392.963	191.313	373.27	5514.57	81.7077	18.72	163.05	95.83	20.02	60.285	72.48	141.35	26.695	14.15	177.5	163.55	33.55	125.25	14.27	1.5255	0.553	3.3625	0.6165	8.104	684.35	49.12	97.525	11.845	46.08	8.691	1.7545	7.457	1.021	6.087	1.1515	3.4515	0.485	3.245	0.4715
Ontario	ONE	0.25	2012.7	0.0231												13.315	115.95	87.795	17.985	88.3	113.3	318.95	19.715	36.565	124.3	151.85	18.395	108.15	11.735	5.9865	2.7615	7.083	1.887	4.1325	648.9	37.28	76.68	9.155	35.46	6.8355	1.3615	5.983	0.817	4.8075	0.913	2.694	0.3785	2.5465	0.368
Ontario	ONE	0.5	2012.1	0.0231	8591.77	13082.7	20830.3	1013.76		5173.5	10799.3	392.417	848.21	6465.63	97.858
Ontario	ONE	1.75	2007.97	0.0226833	8986.47	10316.7	20875.7	1020.83		4941.1	26997.3	323.89	709.727	6793.37	100.201	13.485	113.85	90.295	5134	1510.5	449.85	326.45	20.315	36.345	122.85	154.6	25.725	113.05	19.66	14.765	3.085	7.8905	2.135	5.9745	797	36.75	74.58	8.839	34.145	6.645	1.341	5.8455	0.81	4.7265	0.8935	2.647	0.3715	2.5005	0.3575
Ontario	ONE	2.75	2004.67	0.02235	7805.8	7816.97	40067.7	970.113		4180.87	9861.7	274.957	1995	8616.5	93.483	13.93	121.6	93.44	29.23	106.4	112.95	351.25	20.49	124.2	127	144.75	26.825	112.55	12.15	3.564	3.0685	7.1575	2.31	5.968	863	38.54	77.145	9.247	36.265	6.927	1.3945	6.054	0.823	4.8925	0.925	2.734	0.3825	2.6185	0.371
Ontario	ONE	3.75	2000.83	0.0219	8438.57	7246.37	16530	1034.97		4847.43	2469.67	259.21	607.54	5644.87	88.0967	15.135	129.35	99.045	18.745	91.94	116.85	359.55	22.145	14.31	138.3	136.75	28.45	124.9	13.095	1.632	3.0385	8.049	2.0045	6.662	615	40.805	84.02	10.0105	38.175	7.3385	1.498	6.5305	0.8855	5.236	1.0005	2.965	0.4135	2.7505	0.3995
Ontario	ONE	4.75	1995.28	0.0230375	9373.37	8243.23	21107.7	1062.27		5769.9	3118.73	245.38	1529.13	5828	88.75	14.96	129.35	102.1	17.89	88.31	115.4	374.9	22.37	13.775	138.7	137.3	28.09	122.75	13	1.5	2.788	8.357	2.12	5.9505	618.1	41.495	85.175	9.9565	38.85	7.3345	1.4845	6.4255	0.8845	5.1395	0.98	2.8995	0.412	2.7535	0.3975
Ontario	ONE	5.75	1989.58	0.0299875	8572.13	52750.3	15041	998.797		5961.3	1709.13	233.413	652.167	5619.27	95.8667	13.485	116.35	93.55	14.16	68.76	104.1	368.6	20.15	12.215	124.5	167.75	24.775	105.25	11.46	1.1025	3.476	7.457	2.0355	5.828	560.9	36.985	72.845	8.8785	34.545	6.5345	1.3335	5.745	0.7885	4.6155	0.878	2.5905	0.3705	2.4435	0.354
Ontario	ONE	6.75	1984	0.0359875	8746.13	76656	18634.7	969.393		6230.07	4210.97	229.987	1852.4	5847.3	98.8237	12.27	111.85	112.85	497	114.95	96.005	399.3	18.635	17.5	117.8	184.95	23.275	103.4	11.145	0.0235	3.6795	7.9835	2.15	5.486	517	34.035	68.045	8.2155	31.845	6.0685	1.231	5.35	0.725	4.296	0.811	2.4015	0.3355	2.294	0.3245
Ontario	ONE	7.75	1978.8	0.0391375	8832.87	68069.7	17881.3	963.923		6223.47	2046.43	219.853	703.83	5526.17	96.143	13.605	118.5	116.9	17.49	92.31	101.9	485.4	20.055	19.865	126.55	184.65	24.74	120.2	11.95	1.711	4.4645	10.135	2.325	6.092	550.9	36.98	74.67	8.8395	34.905	6.5155	1.3105	5.7095	0.7865	4.632	0.875	2.5905	0.3685	2.4455	0.354
Ontario	ONE	8.75	1973.47	0.03995	9337.73	58993.3	26347.7	1004.88		6402.7	4590.9	226.397	2483.7	6290.2	110.437	13.01	114.05	128.9	19.21	107.75	111.8	566.05	19.49	30.08	118.9	177	24.795	127.3	11.66	1.835	5.31	11.565	2.7345	5.7695	528.25	36.35	72.825	8.685	34	6.522	1.3075	5.651	0.7785	4.5765	0.8715	2.594	0.3615	2.4175	0.351
Ontario	ONE	9.75	1967.78	0.03375	9726.9	41166.7	24674	1036.63		6449.47	2541.37	233.803	944.167	6329.33	110.757	14.08	121.9	150.7	18.34	99.91	128.55	707.2	20.985	33.415	126.75	165.4	26.395	137.75	13.105	2.344	6.09	13.78	3.342	6.265	558	38.37	78.115	9.2575	36.09	6.926	1.393	6.1305	0.831	4.9895	0.9385	2.7685	0.391	2.66	0.3785
Ontario	ONE	10.75	1962.11	0.0305625	9928.83	31256.3	22799.7	1049.07		6242.4	1657.67	237.117	663.88	6259.07	107.45	14.465	122.6	146.45	19.545	100.035	130.15	615.85	21.895	30.885	132.75	158.1	26.915	129.8	13.03	2.313	5.3705	13.165	3.2015	6.7175	578.25	39.245	78.76	9.536	37.23	7.0085	1.442	6.2365	0.86	5.0565	0.9535	2.8065	0.4005	2.708	0.3865
Ontario	ONE	11.75	1956.56	0.0364125	8703.5	34136.7	20342.3	981.507		5309.8	3278.5	234.767	1494.03	5851.6	102.886	14.885	122.4	131.25	19.62	85.89	111.45	505.35	21.96	30.66	137.45	157.9	26.85	118	12.6	1.7915	3.5175	11.255	2.4765	6.5845	577.85	39.145	79.085	9.589	37.525	7.149	1.4255	6.1455	0.8415	5.081	0.942	2.808	0.395	2.645	0.378
Ontario	ONE	12.75	1951.1	0.042125	8935.83	14062.7	21745	990.88		5215.37	2061.53	221.61	1041.83	5922.1	93.7857	15.395	129.65	125.2	19.205	78.66	98.595	425.85	23.39	25.585	146.35	146.85	27.495	114.7	13.43	1.611	2.9705	10.615	2.4295	6.1055	603.05	41.235	82.68	9.9205	38.775	7.3865	1.492	6.357	0.871	5.1765	0.983	2.9705	0.4015	2.737	0.3905
Ontario	ONE	13.75	1945.68	0.04577	8924.5	12526.7	18988.3	984.76		5178.73	1258.87	214.857	543.047	5665.97	89.442	16.15	133.4	122.15	25.25	68.63	93.77	402.2	24.35	22.87	150.35	145.9	28.32	116.7	13.655	1.6145	2.6545	10.415	2.237	6.8775	607	42.615	84.345	10.225	39.435	7.59	1.5305	6.523	0.9065	5.262	1.017	2.985	0.433	2.8195	0.406
Ontario	ONE	14.75	1939.6	0.04445	8965.37	14675	21912	964.69		5131.1	2009.3	211.643	984.66	5885.9	91.5683	15.58	130.4	106.8	19.06	63.805	88.61	348.5	23.44	23.25	149.15	143.65	27.685	114.15	13.365	1.483	2.124	9.7915	1.9225	6.69	586.55	41.56	82.29	10.0025	38.875	7.3735	1.4985	6.448	0.8825	5.1855	0.989	2.928	0.409	2.7575	0.3975
Ontario	ONE	16.5	1928.6	0.042225	10131.5	7538.2	24867.7	1013.43		4917.63	1385.87	213.13	574.823	6231.77	83.2477	15.77	137.05	93.165	18.4	52.01	71.515	285.3	24.05	19.925	124.75	134.8	26.43	118.9	13.735	1.361	1.347	8.3175	1.676	7.7395	560.4	37.605	76.225	9.4255	36.07	7.004	1.4395	6.1395	0.852	5.065	0.9685	2.879	0.4065	2.746	0.399
Ontario	ONE	18.5	1914.55	0.038825	10487	5357.6	24966	993.75		4741.97	1179.63	208.197	624.477	6136.43	79.9623	14.64	138.6	86.01	18.005	49.695	59.735	216.35	24.005	17.065	87.935	128.5	23.42	118.55	13.52	1.3895	1.0025	6.349	1.3835	6.8485	533.4	32.1	67.44	8.397	32.84	6.5045	1.3255	5.62	0.79	4.6665	0.893	2.6865	0.388	2.6095	0.3815
Ontario	ONE	20.5	1898.22	0.03215	10244	5146.1	26105.7	971.467		4794.1	2232.37	208.197	1980	6217.53	85.4753	15.48	129.5	78.64	16.495	46.49	51.515	156.2	23.095	14.505	136.15	131.3	26.24	114.25	13.37	1.5425	0.603	4.6865	0.9095	6.5725	567.35	38.275	76.875	9.396	35.85	6.9185	1.4225	6.0215	0.849	4.947	0.9465	2.8175	0.396	2.715	0.389
Ontario	ONE	22.5	1879.47	0.0296	10197.8	4924.83	23067.7	1025		4873	1115.97	210.623	544.84	6228.1	83.765	14.755	131.45	78.555	17.395	47.005	48.64	144.15	22.715	14.575	108.85	129.85	23.775	110.35	13.125	1.4215	0.432	4.1695	0.717	6.244	536.15	32.72	66.72	8.3455	32.175	6.32	1.307	5.5135	0.781	4.572	0.895	2.6635	0.381	2.5625	0.3755
Ontario	ONE	24.5	1861.08	0.034625	9798.9	4188.5	21611	1010.36		4604.07	1043.93	207.637	600.463	6305.97	84.4973	15.18	130.95	77.88	16.185	45.045	46.275	128.6	22.46	12.6	136.85	131.85	25.17	108.75	12.72	1.367	0.3235	3.2115	0.38	6.3845	558	37.15	74.3	9.1375	35.375	6.7735	1.382	5.938	0.8225	4.8475	0.9165	2.7445	0.39	2.594	0.3775
Ontario	ONE	27.5	1830.43	0.0281	9958.33	3808	23065.3	1048.57		4796.43	1231.13	220.603	768.55	6230.17	88.514	15.84	135.75	83.22	17.27	47.28	47.145	124.8	22.875	12.67	143.85	135.95	26.21	114.65	12.63	1.2835	0.3145	2.8715	0.5115	6.624	569.85	39.19	78.02	9.576	36.615	7.0915	1.4365	6.148	0.8555	4.9905	0.9565	2.8595	0.4085	2.69	0.3955
Ontario	ONE	30.5	1799.68	0.0281	9178.33	3688.93	23940.7	1016.33		4535.37	1201.63	223.723	707.017	6086.7	89.3917	15.845	135.25	79.72	18.73	52.745	57.57	124.4	22.645	13.625	132.35	134.4	25.95	110.7	12.69	1.6	0.334	2.7845	0.534	6.5565	557.8	37.695	75.245	9.378	36.215	7.001	1.4325	6.0635	0.8475	4.962	0.9495	2.814	0.4035	2.6755	0.3935
Superior	SUW	0.5	2008.87	0.065	12075.5	11420	24737	1517.75	10.0747	7849.6	3479.55	875.38	1036.7	6753.45		14.405	119.15	76.02	19.675	48.54	69.5	139.45	18.58	23.955	94	130.35	19.515	191.2	13.98	0.781	1.5945	2.693	0.976	3.7805	528.35	34.465	82.91	8.633	34.065	6.676	1.364	6.262	0.875	5.3095	1.0225	3.1105	0.4425	3.052	0.44
Superior	SUW	1.25	2006.71	0.06725	11396	7980.4	23998.5	1413.15	8.151	6909.2	3148.9	724.03	1055.5	6132.6		14.825	128.1	80.075	20.285	50.565	73.35	141.2	19.365	26.31	96.835	130.2	29.35	201.75	14.59	0.9355	1.514	2.6995	0.887	3.838	526.4	34.825	81.915	8.721	33.955	6.717	1.3705	6.2635	0.8705	5.3385	1.025	3.0955	0.4405	3.0185	0.434
Superior	SUW	1.75	2005.13	0.066	12083	7281.4	26071	1425.05	8.14485	7085.4	4451.2	661.085	1162.3	6500.75		14.92	127.05	79.26	21.395	50.455	71.63	139.6	19.2	29.245	97.295	131.3	29.14	203.75	14.645	0.995	1.407	2.636	0.8535	3.9135	550.25	35.42	82.975	8.8065	34.43	6.768	1.389	6.249	0.882	5.325	1.035	3.1615	0.444	3.0195	0.444
Superior	SUW	2.5	2002.57	0.06	11443.5	7201	43640.5	1326.9	7.48245	6606.2	1637.35	648.21	2382.55	6561.3		14.405	124.25	77.635	19.47	48.51	72.81	131.4	18.805	53.065	95.29	126.65	28.645	198.2	14.155	0.953	1.0985	2.711	0.993	3.766	542.85	35.645	82.56	8.8235	34.905	6.8695	1.387	6.282	0.8895	5.3415	1.028	3.111	0.442	3.005	0.4415
Superior	SUW	3.5	1998.76	0.057	12380	6652.75	20225	1469.5	8.70005	7063.9	988.37	556.65	921.8	6075		14.79	125.25	80.485	19.4	49.295	68.655	143.35	19.42	11.3	97.37	135.45	29.565	202.4	15.005	0.7795	1.458	2.816	0.9535	3.873	539.1	35.88	82.64	8.9595	34.765	6.869	1.3825	6.298	0.896	5.373	1.047	3.1565	0.4495	3.016	0.4415
Superior	SUW	4	1996.62	0.0545	13187	7032.5	21735	1572.05	9.43875	7599.95	951.29	576.955	854.255	6552.65		15.005	127.1	81.31	20.395	50.32	70.275	146.55	19.725	12.135	98.93	135.45	29.875	204.15	15.055	0.734	1.5805	2.8485	0.856	3.9685	549.6	36.51	83.37	9.065	35.15	6.9315	1.4105	6.382	0.9035	5.4695	1.0525	3.1935	0.4595	3.0495	0.451
Superior	SUW	4.75	1993.31	0.05275	12957.5	7087.85	20775	1564.1	9.6228	7596.8	890.4	532.97	805.75	6248.8		14.965	127.25	81.335	19.625	49.31	70.66	152.35	19.905	12.88	100.42	137.9	29.925	204	14.955	0.7925	1.534	2.824	0.853	3.7525	564.4	36.565	81.895	9.1035	35.945	6.9305	1.427	6.428	0.913	5.523	1.0575	3.2035	0.4595	3.186	0.4535
Superior	SUW	5.75	1988.57	0.0545	12055	6635.6	23196	1398.75	8.36855	6902.2	1060.75	447	922.07	6156.9		14.6	122	79.69	21.3	50.78	71.955	157.1	19.065	13.875	96.675	136.5	29.55	207.75	14.315	0.436	1.81	2.94	0.84	4.089	546.25	35.78	78.885	8.92	34.695	6.8045	1.3875	6.3395	0.9035	5.396	1.049	3.1465	0.4535	3.0505	0.44
Superior	SUW	6.5	1984.87	0.053	12185.5	6901.95	21239	1419	8.738	6998.25	1046.75	433.31	872.55	6179.15		14.325	119.5	77.49	19.535	48.25	73.01	165.75	18.675	13.52	94.01	133.9	28.985	198.8	14.31	1.07	1.798	3.2245	1.058	4.335	527.95	34.815	76.195	8.65	33.65	6.663	1.362	6.137	0.8645	5.266	1.0085	3.077	0.4245	2.9555	0.422
Superior	SUW	7.5	1980.26	0.077	12430.5	7094.7	22478	1444.3	8.99435	7266.1	1094.25	400.93	889.745	6219		14.505	120.5	79.51	903.25	565.3	294.95	172.2	19.11	14.995	93.28	130.2	29.445	192.25	35.22	3.0475	1.9385	4.162	1.212	4.6655	519.2	35.845	78.835	8.8425	34.72	6.7725	1.388	6.2615	0.8905	5.3565	1.041	3.141	0.44	3.0095	0.4235
Superior	SUW	8.5	1976.41	0.105	12503	7007.3	22959.5	1392.55	9.00085	7097.45	1099.15	345.155	917.375	6107.9		14.495	117	75.325	19.975	47.215	68.975	166.8	18.445	14.45	93.16	137.25	28.685	193.6	14.255	7.6715	1.683	3.558	1.118	4.5455	529.3	34.89	77.63	8.69	34.605	6.6485	1.3595	6.18	0.872	5.263	1.0135	3.051	0.43	2.9305	0.423
Superior	SUW	9.75	1971.96	0.112889	11972.5	7105.25	22494	1367.25	8.6192	6872.25	1055	275.505	915.195	6066.15		13.645	117.35	76.035	21.335	48.055	70.665	179.3	18.44	13.9	91.77	138.7	28.7	189.95	14.31	20.885	1.791	3.767	0.8055	4.413	530.25	34.61	76.14	8.567	33.63	6.6295	1.372	6.0735	0.8735	5.1435	1.007	3.034	0.429	2.9085	0.4155
Superior	SUW	10.75	1968.18	0.108444	8098.9	5997	18135.5	1158.35	7.51095	4991.8	799.42	143.19	728.135	5434.65		13.705	117.35	104	600.75	55.865	76.7	176.35	18.325	14.625	91.4	144.15	28.63	195.55	14.725	16.345	2.0035	3.798	0.958	3.8965	535.8	34.93	77.25	8.7145	33.95	6.6605	1.403	6.0385	0.866	5.236	1.0065	3.05	0.4295	2.893	0.424
Superior	SUW	12	1963.56	0.103125	10801.5	6800.25	18731.5	1378.05	8.69365	6402.55	1062.85	176.775	772.025	6341.9		14.64	122.4	79.23	19.03	47.505	70.04	167.8	19.01	13.305	97.38	145.1	29.005	202.9	15.225	1.0985	1.6815	3.8345	0.9565	3.751	559.9	35.595	77.365	8.9305	34.285	6.8575	1.414	6.2445	0.895	5.322	1.024	3.1115	0.4425	2.992	0.4375
Superior	SUW	13.25	1959.39	0.09875	12645.5	7122.75	24004.5	1492.85	9.55645	7332.25	994.345	211.8	781.515	6791.8		15.19	128.15	89.08	212.8	54.96	82.705	176.15	20.065	15.115	100.1	140	29.905	203.65	14.93	0.63	1.806	4.282	0.933	3.8685	561.5	37.255	79.985	9.1205	36.325	7.069	1.446	6.4795	0.9215	5.607	1.0805	3.236	0.4595	3.087	0.4535
Superior	SUW	14.75	1953.97	0.095	12589	7024.55	21052.5	1504.6	9.77265	7284.35	1031.75	157.98	731.79	6376.25		15.18	129.6	82.535	20.84	52.32	85.01	182	20.34	14.77	101.3	136.95	30.06	198.95	14.79	1.3855	2.2805	4.44	0.976	3.9435	566.15	37.795	80.625	9.255	35.96	7.0475	1.45	6.4195	0.9145	5.455	1.061	3.225	0.458	3.0595	0.441
Superior	SUW	15.75	1950.23	0.093	10711.5	6385.9	20627.5	1284.6	7.4241	5972.85	1007.35	94.765	745.815	6573.85		14.37	122.8	79.89	19.805	48.805	85.705	167.55	19.16	13.955	94.55	146.55	29.385	200.95	14.905	0.6875	2.269	4.323	1.22	3.3835	555.4	36.2	78.11	8.957	35.235	6.8645	1.435	6.3315	0.904	5.383	1.032	3.118	0.447	2.9865	0.435
Superior	SUW	17	1944.7	0.091125	11128	6720.6	17932	1331.95	8.08605	6186.8	897.32	96.4885	743.43	6849.55		14.425	122.25	79.265	18.77	47.83	86.45	156.7	18.545	12.45	94.31	147.45	29.17	208.25	14.915	1.016	2.298	4.4625	0.9645	3.553	562.05	36.21	78.6	8.999	35.51	6.9575	1.418	6.3435	0.903	5.3545	1.0375	3.112	0.441	2.986	0.434
Superior	SUW	18.25	1939.51	0.085	10906.5	6467.55	22220.5	1278.75	7.6748	6036.1	1094.7	97.863	1280.85	6938.95		14.785	120.85	82.31	22.14	48.205	78.995	139.95	18.695	12.06	92.885	151.45	29.985	208.5	15.005	0.788	1.7765	4.0915	1.302	3.419	557.1	35.69	78.315	8.9415	34.905	6.8805	1.433	6.3825	0.9165	5.446	1.057	3.248	0.4535	3.081	0.445
Superior	SUW	19.75	1934.08	0.065	10810.5	7466.8	17658.5	1312.75	8.1939	6696.75	1091.8	77.391	785.315	6452.45		14.735	119.4	79.125	18.6	46.74	64.17	131.25	19.05	10.765	95.075	151.2	28.505	201.25	14.92	0.4455	1.3565	3.401	0.8475	3.4635	569.6	36.065	78.63	8.945	35.125	6.81	1.431	6.2085	0.888	5.294	1.04	3.0975	0.4375	2.912	0.435
Superior	SUW	21	1929.35	0.0697619	11197	6783.7	18867	1333.05	8.6725	6415.25	792.665	74.933	783.03	6635.3		14.275	119.25	80.1	18.49	46.78	60.6	118.05	19.095	10.265	96.51	151.1	29.325	198.7	14.855	0.737	1.103	2.9875	0.731	3.4775	564.4	36.085	79.94	8.989	34.98	6.798	1.4405	6.313	0.9075	5.3115	1.0235	3.1095	0.4455	2.971	0.433
Superior	SUW	22.25	1924.61	0.0745238	11564	8031.6	18938	1406.35	9.11145	7294.4	959.34	88.478	806.1	6859.1		14.94	121.1	81.325	18.83	47.815	56.94	115.65	19.505	9.308	98.175	150	28.61	195.65	14.78	0.65	0.886	2.5675	0.697	3.722	575.6	36.925	80.085	9.057	35.245	6.9865	1.449	6.3345	0.9095	5.3225	1.036	3.0825	0.442	2.968	0.4295
Superior	SUW	23.75	1918.93	0.0802381	12624.5	8467.6	21971	1545.65	9.47895	8041.2	1065.2	94.7965	778.74	7657.95		15.605	129.45	85.235	20.75	51.255	56.05	118.15	20.33	9.7965	101.05	143.1	30.51	197.1	15.165	0.667	0.8275	2.705	0.702	4.161	578.15	39.14	86.695	9.711	38.125	7.3155	1.521	6.7065	0.9555	5.6825	1.121	3.3145	0.471	3.1345	0.4585
Superior	SUW	25	1914.2	0.085	12681.5	7278.65	21822	1511.3	9.21845	7255.05	758.25	60.541	786.55	7594.1		15.665	128.6	85.875	20.82	51.155	51.345	117.25	20.69	8.5665	102.45	140.85	29.46	198.55	14.77	0.6385	0.623	2.722	0.688	4.0435	571.7	37.415	81.63	9.2705	36.125	6.9795	1.4335	6.467	0.9195	5.4335	1.0565	3.148	0.4495	3.03	0.4435
Superior	SUW	26.25	1909.57	0.08625	12156	7343.2	23545.5	1487.85	9.2922	7006.7	1069.85	88.281	1007.59	7111.65		15.445	128.2	84.51	27.23	55.66	51.35	116	20.125	9.3795	101.8	133.15	29.565	196.8	14.85	0.571	0.5055	2.3605	0.839	4.0185	562.6	37.97	82.82	9.4055	36.55	7.0545	1.4335	6.4475	0.9215	5.489	1.0675	3.214	0.4445	3.0675	0.434
Superior	SUW	27.25	1905.86	0.08725	8569.5	6478.45	15002	1297.6	5.9778	5331.8	739.03	-18.69	661.425	5957.4		15.685	126.1	82.275	20.76	50.89	49.745	106.6	19.805	8.414	100.81	134.7	30.29	202.5	15.015	0.636	0.4465	2.244	0.707	3.8205	563.1	37.54	80.585	9.1975	35.535	6.9985	1.442	6.5125	0.935	5.5165	1.062	3.181	0.4525	3.0685	0.449
Superior	SUW	28.5	1901.23	0.0885	11435.5	7051.65	17840.5	1426.45	8.0182	6644.7	1017.35	50.4246	743.62	6272.95		16.095	127.05	82.55	21.21	50.79	49.055	106.95	20.01	8.346	101.1	135.25	29.845	206.9	15.435	0.82	0.4005	2.2655	0.7345	3.9185	573.05	38.38	83.395	9.436	37.11	7.1505	1.475	6.6435	0.9565	5.6525	1.1	3.313	0.473	3.15	0.4635
Superior	SUW	31	1891.93	0.083	8095	6124.85	14291.5	1200.1	6.06055	5072.25	725.375	-39.1455	665.82	5423.55		15.435	124.3	84.07	1485	728.55	179.35	99.445	19.925	8.258	102.75	137.25	29.665	210.6	46.005	3.9385	0.2965	2.841	1.0005	3.7695	571.7	37.4	81.105	9.2565	36.39	7.037	1.4735	6.5605	0.938	5.4965	1.0645	3.2495	0.458	3.1145	0.4565
Superior	SUW	34	1880.72	0.062	11175.5	6769.7	17027	1355.75	7.06965	6609.7	740.545	18.4745	712.115	6334		15.95	128.2	84.635	20.595	51.68	48.25	103.75	20.46	7.961	103.3	135.25	30.25	213.4	15.21	0.6245	0.354	2.186	0.637	3.8325	570.35	37.115	81.335	9.26	36.16	7.095	1.451	6.489	0.944	5.5105	1.0815	3.2755	0.465	3.096	0.456
Superior	SUW	37	1862.61	0.059	8985.75	7088	15251	1391.3	6.5276	5781.35	745.91	-6.3595	673.555	6358.15		15.955	125.55	81.81	20.685	51.55	45.445	105.1	20.185	8.1355	102.15	134	29.545	205.4	15.265	0.8855	0.1965	1.2225	0.783	4.0405	576.3	37.76	81.675	9.3235	36.335	7.0745	1.4545	6.48	0.9405	5.4975	1.071	3.2125	0.4545	3.0795	0.45
Superior	SUW	40	1841.05	0.065	12380	6954.85	19804	1461	8.42745	6991.45	953.62	70.2319	897.945	7363.15		15.945	126.5	83.315	20.135	50.965	48.29	102.55	19.825	7.862	101.7	138.7	30.875	215.75	15.355	0.754	0.3755	2.145	0.649	3.725	579.1	38.015	83.165	9.482	37.175	7.212	1.5005	6.7355	0.966	5.692	1.0905	3.3195	0.4705	3.196	0.467
Superior	SUW	43	1820	0.065	10730	6410.9	18478.5	1311.1	7.3269	6211.8	650.24	16.11	791.765	6721.4		14.775	119.35	79.365	17.89	44.85	42.275	90.775	19.09	7.5105	99.88	143.65	30.155	230.9	15.285	0.862	0.306	2.0175	0.6255	3.4435	579.15	36.8	80.06	9.2855	36.455	7.12	1.4595	6.658	0.949	5.626	1.0855	3.3185	0.4635	3.172	0.462
Michigan	MIC51S	0.375	2008.17	0.033444	6167.45	43631.5	15482	1038.25	11.4095	20417.5	2180.15	97.283	519.75	5336.5		10.99	92.395	91.13	15.08	57.225	63.385	290.45	16.11	23.895	104.45	117.25	20.27	115.35	10.785	1.6975	2.043	10.995	1.434	5.3305	449.5	28.95	52.065	7.0195	26.645	5.0325	1.014	4.47	0.623	3.705	0.7065	2.1905	0.3055	2.079	0.3075
Michigan	MIC51S	1.375	2003.5	0.031788	6513.6	43899.5	15900.5	1020.7	11.0555	20608	2208.15	68.105	504.68	5402.2		11.025	93.15	92.165	15.15	56.705	67.57	294.9	16.28	23.605	106	117.05	20.57	118.7	10.91	1.503	2.05	11.365	1.6835	5.5145	450.25	28.515	52.78	7.015	27.465	5.1265	1.0185	4.444	0.6205	3.7	0.723	2.1745	0.31	2.0965	0.313
Michigan	MIC51S	2.375	1995.56	0.024595	5945.7	45403	14462.5	974.23	11.131	20431	2216.75	53.6395	486.36	5137.65		10.9	91.1	90.66	15.185	57.325	66.645	295.6	16.21	22.555	104	117.65	20.47	121.8	10.55	1.8185	2.24	10.785	1.622	5.4675	447.35	27.42	51.815	6.88	26.375	4.982	1.0155	4.3665	0.618	3.7145	0.709	2.172	0.307	2.116	0.3045
Michigan	MIC51S	3.375	1984.09	0.019168	6018.3	47644.5	14501	907.64	9.17125	20257	2282.3	44.415	477.215	4728.4		10.9	89.685	90.635	14.835	56.775	64.61	302.3	16.19	21.7	102.1	118.35	20.135	119.65	10.595	1.241	2.4545	10.665	1.623	5.174	444.1	26.81	50.805	6.843	26.05	4.947	1.003	4.361	0.6125	3.6085	0.702	2.154	0.3035	2.066	0.3025
Michigan	MIC51S	4.375	1968.85	0.020246	6059.5	50918.5	15007	924.155	9.0768	19576.5	3454.8	44.6365	476.16	5288.65		10.71	88.385	89.86	14.625	54.585	64.24	326.25	15.69	22.135	100.26	123.6	11.885	122.65	10.7	2.1675	2.7945	12.03	1.7555	5.0135	501.4	26.02	49.64	6.687	25.945	4.8405	0.99	4.337	0.61	3.6105	0.697	2.1085	0.3025	2.075	0.302
Michigan	MIC51S	5.375	1957.7	0.031568	6547.55	46993.5	19262	1047.15	10.8533	18138	2150.2	46.2645	639.82	6539.75		10.765	86.64	79.315	20.31	43.885	57.295	282.6	16.355	24.25	103.45	124.8	19.995	113.6	10.545	1.051	2.3325	8.312	1.931	4.8815	470.5	25.22	50.15	6.784	25.9	4.931	0.993	4.3075	0.6105	3.6265	0.7	2.1285	0.3055	2.077	0.307
Michigan	MIC51S	6.375	1948.15	0.033564	6574.75	38227	11624	997.29	10.973	18160	1499.4	50.5075	366.76	5205.4		11.31	88.43	74.075	14.315	40.035	57.555	200.5	17.025	10.34	110.5	120.75	21.29	125.7	10.79	0.8505	1.4275	7.0875	1.624	5.2365	461.2	26.635	52.505	7.1685	27.72	5.2155	1.0535	4.582	0.6415	3.857	0.735	2.223	0.3205	2.173	0.3205
Michigan	MIC51S	7.25	1941.75	0.05985	6270.4	29846	15643	1015.2	11.6855	17251	564.61	47.014	591.215	5189.65		11.83	94.275	69.24	14.255	41.905	40.01	131.25	17.1	13.15	115.6	117.2	21.79	125.85	10.73	1.5555	1.3285	2.633	2.113	5.2095	465.3	27.5	54.115	7.3795	28.57	5.316	1.071	4.679	0.655	3.9025	0.7515	2.295	0.325	2.223	0.3275
Michigan	MIC51S	8.25	1937.95	0.1669	5451.65	23860.5	9639.55	906.305	11.2425	14716.5	434.925	41.756	281.155	4256.35		8.974	71.865	98.89	488	40.495	29.865	70.43	13.825	5.429	94.695	118.1	16.68	117.6	8.121	0.5725	0.4105	1.4975	0.4725	3.8595	432.4	22.64	42.23	5.852	22.235	4.189	0.858	3.678	0.509	3.027	0.588	1.77	0.2595	1.7595	0.258
Michigan	MIC51S	8.75	1937.15	0.2946	6192.1	19565.5	11529.5	1002.74	12.2345	12478.5	421.285	43.15	306.405	4764.7		10.91	86.275	65.89	261.25	42.725	33.765	80.315	16.175	6.5765	111.5	120.75	20.275	143.6	9.9635	1.123	0.402	1.797	0.4745	4.675	482.3	25.68	50.44	7.023	26.675	5.0275	1.029	4.4185	0.609	3.65	0.709	2.148	0.3095	2.0835	0.308
Michigan	MIC51S	9.75	1936.28	0.876925	5798.7	13733.5	11539.5	925.76	10.4834	9124	409.75	-40.0125	282.325	4220.6		7.9795	61.895	42.995	9.702	26.405	22.35	55.355	12.54	4.6255	87.72	117.1	15	106.7	7.3715	0.268	0.193	1.181	0.246	3.44	454.5	20.085	38.155	5.4065	20.79	3.8695	0.8025	3.2965	0.454	2.705	0.5225	1.599	0.23	1.603	0.235
Michigan	MIC51S	10.25	1936.03	1.45768	4862.5	10307.5	10028.6	784.15	9.2985	6881.3	345.085	-56.918	258.12	3803.05		8.667	65.67	45.815	10.575	27.565	23.565	59.855	13.115	5.2585	92.195	115.35	16.005	102.5	6.966	0.3745	0.177	1.1525	0.2615	3.5285	445.8	20.17	40.015	5.5705	21.4	4.006	0.8245	3.461	0.4795	2.8465	0.5505	1.702	0.2405	1.6375	0.239
Michigan	MIC51S	11.75	1933.85	1.71286	3948.7	7034.7	9495.8	627.825	6.0877	4716.65	323.465	-76.8435	236.54	3466.1		6.303	49.51	33.9	7.4865	19.305	15.79	41.22	10.165	5.0145	76.635	111.65	12.12	106.9	7.925	8.5705	0.166	0.9735	0.2085	2.5465	429.75	14.685	29.045	4.0505	15.63	2.9275	0.6395	2.523	0.3585	2.171	0.425	1.354	0.197	1.3355	0.199
Michigan	MIC51S	13.25	1927.53	0.0968	6804.95	10174.5	16426.5	1024.4	9.9128	6817.1	1077.6	-38.815	547.405	4795.05		13.195	103.05	73.765	15.95	47.85	40.29	95.825	19.435	16.43	134	127.3	23.455	138.9	11.255	0.7085	0.3665	2.103	0.3285	6.062	578.4	28.98	58.63	8.125	30.935	5.8185	1.1825	4.996	0.7015	4.1755	0.808	2.453	0.3535	2.403	0.355
Michigan	MIC51S	14.75	1906.38	0.0353	4009.9	25009.5	76503.5	711.44	4.9617	11230	1755.2	-68.6036	4891.65	11886		10.345	85.515	59.77	15.24	41.845	37.81	87.985	15.225	78.69	102.05	147.3	23.96	102.65	8.889	0.384	0.6455	1.564	0.2505	4.929	698.7	26.585	48.515	7.128	27.64	5.2505	1.072	4.71	0.6565	3.9185	0.7675	2.3225	0.328	2.1955	0.315
Michigan	MIC51S	17.5	1862.65	0.0368	5756.25	43078.5	8196.65	1078	9.83175	17623	458.055	-36.2935	317.95	4290.15		12.055	116.75	69.535	11.395	36.685	59.69	96.455	17.66	5.417	118.55	125.2	22.485	121.5	10.6	1.9465	0.8765	1.8695	0.9425	5.447	476.25	26.98	53.06	7.5795	29.185	5.4775	1.0975	4.844	0.676	4.0385	0.782	2.3905	0.3425	2.292	0.3405
Michigan	MIC51S	20.5	1814.95	0.0368	5265.2	85471.5	7803.55	992.91	8.8533	16833.5	392.355	-23.0805	317.145	4011.6		10.59	84.14	59.52	12.95	38.41	39.325	81.06	15.895	4.3265	105.25	134.85	20.48	101.55	8.9435	2.3195	0.4695	1.678	0.331	4.8125	421.5	23.905	47.37	6.795	25.965	4.881	0.991	4.38	0.6105	3.63	0.703	2.151	0.302	2.0825	0.296
Michigan	MIC51S	23.5	1767.25	0.0368	5329.65	101835	7863.35	1019.4	10.0581	15535.5	305.12	-20.728	319.2	4152.8		10.335	81.23	57.06	11.53	33.865	37.035	79.26	15.175	4.329	102.15	139.2	19.22	95.195	8.8415	0.832	0.444	1.711	0.3465	5.3025	407.15	22.94	45.34	6.4385	24.935	4.6885	0.9365	4.088	0.5695	3.409	0.6645	2.0165	0.2885	1.9535	0.2845
Michigan	MIC51S	26.5	1719.55	0.0368	5044.15	125040	8767.5	985.585	10.5845	15130.5	257.74	-15.9095	325.26	4379.55		9.6395	76.82	53.745	13.295	37.285	34.475	72.2	14.355	4.878	96.01	147.55	18.2	86.945	8.129	3.356	0.3765	1.58	0.383	4.407	384	21.26	42.03	6.019	23.15	4.3185	0.879	3.8655	0.532	3.206	0.6235	1.9105	0.271	1.835	0.266
Michigan	MIC51S	29.5	1671.85	0.0368	5071.3	125035	13433	990.58	8.9846	11954	214.18	-26.612	319.385	4507.4		9.2885	74.855	50.815	12.66	32.92	30.82	70.63	14.165	4.979	93.4	151.2	18.105	89.795	8.704	11.025	0.357	1.534	0.4195	4.6735	388.45	21.73	42.135	6.1565	23.58	4.4855	0.9025	3.949	0.5565	3.284	0.6395	1.9105	0.275	1.849	0.272
Huron	HUK78	0	2012.5	0.066	10552.1	4936.25	23535.5	2134.9	15.077	6481.8	2508.6	149.925	651.705	7906.9		13.825	113.85	95.795	19.435	98.85	82.37	208.2	22.605	25.055	126	155.55	17	137	12.365	1.191	1.5855	4.982	1.338	4.9665	614.45	43.655	88.365	9.862	37.715	6.791	1.3635	5.7985	0.801	4.7035	0.891	2.664	0.3715	2.512	0.3655
Huron	HUK78	0.5	2011.1	0.066	10733.6	4497.8	23349.5	2182.75	16.216	6561.75	1368.9	177.685	655.52	8508.85		13.64	113.6	94.73	19.19	96.96	80.19	212.95	22.235	18.335	123.9	152.55	25.78	132.2	12.22	0.938	1.6055	4.867	1.2785	5.007	597.1	43.06	86.26	9.659	37.13	6.78	1.335	5.8195	0.7725	4.634	0.871	2.597	0.3685	2.4875	0.356
Huron	HUK78	1	2009.6	0.06808	10793.5	4576.2	23648	2219.3	16.647	6687.25	1208.85	182.305	549.67	8719.4		13.36	114.85	96.47	18.99	94.99	82.215	221.7	22.48	18.825	125.95	152.25	26.2	133.3	12.365	0.944	1.6205	5.111	1.2635	5.1585	606.85	43.725	87.84	9.8505	37.015	6.758	1.3515	5.802	0.7875	4.7055	0.885	2.6905	0.367	2.551	0.3625
Huron	HUK78	2	2006.6	0.07224	10491.8	4263.05	24731.5	2165.7	16.07	6361.3	1461.3	160.725	748.55	8835.35		13.58	113.75	95.695	19.06	93.155	81.1	209.7	22.26	20.705	123.4	151.1	25.71	131.55	12.28	0.9515	1.388	5.0025	1.264	6.193	597.85	43.585	85.915	9.785	37.145	6.7825	1.334	5.7975	0.78	4.6475	0.883	2.6485	0.3665	2.472	0.3575
Huron	HUK78	3	2003.6	0.0764	10707.5	4437.5	22303	2157.1	15.869	6454.35	1268.45	140.95	561.31	8340.45		13.59	116	98.125	18.865	91.395	84.235	227.5	22.55	18.46	127.4	154.1	25.92	131.5	12.3	1.5345	1.8395	5.3195	1.3295	5.3055	612.65	43.75	88.255	9.854	37.635	6.8395	1.351	5.8865	0.7925	4.7085	0.8875	2.674	0.3755	2.5285	0.3645
Huron	HUK78	5	1997.1	0.0697	10631.5	4221.9	22926.5	2161.2	16.056	6407	1100.9	171.61	478.31	8432.35		13.655	116.7	99.345	20.705	92.99	83.845	228	22.72	18.365	126.9	155.55	26.635	130.45	12.425	1.23	1.9585	5.363	1.533	5.1545	626.9	44.115	88.27	10.005	38.88	6.8965	1.378	5.9295	0.7995	4.7685	0.907	2.7225	0.377	2.5375	0.3665
Huron	HUK78	7	1990.43	0.0693	10968	4337.15	23574	2186.2	15.6745	6528.45	1314.9	148.51	636.22	8563.1		14.05	114.75	97.83	18.89	94.345	82.95	239.05	22.555	19.825	126.65	156.75	26.71	132.9	12.485	1.493	1.7835	5.6805	1.3855	5.183	614.2	44.275	89.12	10.01	38.435	6.959	1.371	5.9325	0.7985	4.8415	0.9035	2.706	0.3745	2.569	0.3645
Huron	HUK78	9	1983.7	0.0685	14920.5	4439.55	22376	2228.65	18.767	6550.45	1086.7	106.218	497.095	8628.6		6.7025	112.85	124.55	309	96.22	83.12	242	20.365	17.86	45.59	114.9	8.0705	126.35	12.215	1.04	1.7915	5.3655	1.3515	4.3845	482.45	14.46	27.625	3.501	13.25	2.354	0.471	1.9895	0.2665	1.5955	0.307	0.9275	0.132	0.9265	0.133
Huron	HUK78	10	1980.3	0.0679	14247.5	4244.9	22849	2114.05	17.8625	6235.2	1123.1	94.6345	549.575	8460.55		13.625	111.45	96.28	18.64	91.495	80.55	236.35	22.315	21.43	123.75	151.8	25.99	130.2	12.275	1.2785	1.729	5.663	1.4215	5.327	603	42.93	85.66	9.8325	37.745	6.829	1.3605	5.863	0.7875	4.7275	0.885	2.668	0.3675	2.5265	0.361
Huron	HUK78	11	1976.83	0.068475	13833.5	4309.6	21841	2115.5	18.07	6184.55	1057.25	102.356	506.15	8389.8		13.5	112.4	96.655	17.665	84.415	79.13	237.85	22.53	17.655	124.65	152.15	25.645	127.2	12.19	1.3205	1.9315	5.4755	1.4165	5.411	598.6	41.8	83.925	9.763	36.94	6.6665	1.33	5.7165	0.7725	4.5755	0.877	2.624	0.361	2.476	0.3515
Huron	HUK78	13	1969.88	0.069625	14327.5	4226.2	21821.5	2170.45	18.233	6304.45	1129.55	108.3	555.1	8480.95		13.49	112	97.14	3021.5	776.3	172.3	227.45	22.87	17.855	124.95	156.5	25.92	130.1	15.25	1.3315	1.867	5.6985	1.482	5.1355	607.95	42.385	84.36	9.843	36.935	6.8125	1.3445	5.797	0.78	4.6585	0.8845	2.6385	0.368	2.4695	0.3575
Huron	HUK78	15	1962.67	0.0686	14624.5	4454.8	22624	2186.75	18.634	6490.35	1237.05	97.5525	664.83	8286.75		13.705	112.9	95.195	20.505	75.575	64.715	206.5	22.51	16.765	125.7	152.75	25.95	129.3	12.2	0.879	1.934	4.8915	1.3215	5.178	614.45	42.2	84.56	9.883	37.515	6.869	1.3575	5.8825	0.798	4.661	0.89	2.657	0.3725	2.5025	0.3605
Huron	HUK78	17	1955.22	0.0654	15529.5	4510.25	21956	2261.75	18.9235	6710.6	1094.7	111.24	521.155	8693.3		13.74	111.8	92.155	18.77	66.405	66.85	188.55	22.465	15.895	126.3	154.85	26	131.75	12.33	0.821	1.697	4.6355	1.2845	5.019	626.75	42.68	84.85	10.0045	37.825	6.8555	1.364	5.898	0.7955	4.71	0.892	2.6745	0.3725	2.535	0.3645
Huron	HUK78	18	1951.5	0.0638	15508.5	4595.8	23063	2263.35	19.0195	6764.35	1197.7	106.82	590.65	8666.5		13.785	113.6	92.98	20.485	73.305	66.195	185.1	22.52	15.55	127.55	154.4	26.45	133.2	12.38	1.056	1.775	4.4505	1.2475	5.1025	632.15	43.155	86.6	10.18	38.765	6.971	1.401	5.987	0.813	4.814	0.916	2.741	0.3845	2.591	0.37
Huron	HUK78	20	1943.85	0.0654	15107.5	4445	22518.5	2250.05	19.3565	6720.05	1242.25	115.84	686.03	8583.8		13.84	114.45	93.5	18.56	61.775	62.255	176.65	22.55	13.81	128.2	154.8	26.87	135.55	12.305	0.8405	1.857	4.226	1.1485	5.0865	635.95	44.115	87.385	10.305	39.325	7.0995	1.4015	6.05	0.821	4.882	0.9315	2.7855	0.391	2.6305	0.38
Huron	HUK78	22	1936.2	0.067	15949	4547.75	25058.5	2289.5	18.6945	6965.95	1213.3	123.46	772.14	9146.25		13.875	112.95	91.715	19.855	61.37	56.86	145.8	22.23	14.01	126.85	157.35	26.895	132.35	12.075	1.0735	1.348	3.273	0.9385	4.956	645.55	44.52	86.82	10.32	40.155	7.181	1.415	6.1485	0.8245	4.9005	0.933	2.7645	0.387	2.626	0.376
Huron	HUK78	26	1920	0.0606	15116.5	4438.6	24495.5	2225.85	19.106	6748.7	1166.3	112.455	774.82	8511.3		13.67	111.4	91.23	19.405	56.04	51.13	116.25	22.055	12.27	125.85	156.8	26.97	135.35	12.01	0.9695	0.657	2.4295	0.621	4.926	644.35	44.825	87.84	10.515	40.13	7.177	1.433	6.1425	0.83	4.941	0.938	2.8075	0.3915	2.6335	0.378
Huron	HUK78	30	1902.7	0.0576	14703.5	4348.3	23994.5	2137.45	17.3265	6653.5	1170.35	109.34	761.64	7570.35		13.72	109.55	90.445	19.405	56.375	48.28	102	21.61	10.605	123.9	159.15	27.185	136.45	11.92	0.7995	0.4125	2.0655	0.465	4.6615	642.55	44.71	87.435	10.465	40.16	7.2175	1.427	6.1375	0.8265	4.955	0.9345	2.7755	0.3905	2.6545	0.377
Huron	HUK78	34	1884.3	0.0575	17381.5	4264.6	26496.5	2217	19.21	7298.3	1271.45	125.71	897.025	8434.15		13.885	110.1	92.51	31	53.995	47.58	100.48	21.77	10.86	122.9	159.15	27.215	138.45	12.105	1.194	0.3625	2.2635	0.4495	4.611	657.3	45.31	88.11	10.545	40.19	7.258	1.4335	6.1955	0.831	4.953	0.9335	2.79	0.39	2.6315	0.376
Huron	HUK78	36	1874	0.05425	17587.5	4530.95	26340	2255.85	18.9615	7393.9	1225.85	121.785	868.31	8425.75		13.615	108.7	90.945	18.82	54.715	47.97	100.515	21.94	10.455	122.1	159.65	26.995	137.35	12.005	0.92	0.3925	1.98	0.4455	4.5685	651.75	45.155	87.46	10.475	39.55	7.1605	1.4295	6.152	0.8265	4.8505	0.9195	2.7695	0.3855	2.5925	0.374
Huron	HU12	0	2012.5	0.0766	9762.5	43223.5	22904.5	1388.9	12.8855	26788	3929.35	129.738	885.905	8429.4		10.155	90.615	83.34	880.75	69.24	46.365	120.6	15.185	35.485	91.725	133.7	10.505	115.35	9.8325	1.302	1.1045	2.538	0.882	3.809	422.95	29.815	64.615	6.697	26.355	4.845	1.0045	4.265	0.5725	3.4535	0.65	1.9735	0.2715	1.8765	0.2705
Huron	HU12	1.2	2010.76	0.07856	9357.7	44865.5	21466	1335.1	12.3055	27421	1095.6	55.112	910.07	8421.5		10.365	90.065	67.595	13.25	50.46	40.875	119.3	15.17	24.08	92.23	136.45	19.11	121.25	9.9965	0.9595	0.916	2.5105	0.839	3.5695	408.6	33.16	61.245	6.6795	26.05	4.915	1.001	4.2915	0.573	3.468	0.647	1.973	0.2745	1.8755	0.275
Huron	HU12	2.2	2008.84	0.08136	11039.3	36031	18208	1424.8	13.591	23216.5	714.68	70.6335	515.505	8020.5		11.235	99.305	73.105	14.055	63.195	48.465	145.2	16.61	11.13	100.715	137	20.915	129	11.09	0.496	1.143	3.168	0.9565	4.0325	436.05	31.82	66.085	7.2565	28.565	5.3825	1.08	4.6055	0.618	3.7955	0.7075	2.129	0.302	2.064	0.293
Huron	HU12	3.5	2005.83	0.08565	9708.35	31591	18617	1308.9	11.8395	20608.5	681.365	48.4065	521.595	7808.65		10.92	97.775	72.095	13.855	61.835	51.8	153.5	16.7	13.07	98.83	136.05	21	134.2	11.11	1.2295	1.1885	3.52	0.9955	3.9175	440.15	31.825	64.5	7.277	27.905	5.269	1.072	4.5215	0.612	3.7005	0.703	2.1115	0.2975	2.04	0.293
Huron	HU12	4.5	2002.88	0.08975	8056.55	33599	17787	1156.1	11.2245	21470.5	549.185	18.6887	512.595	6825.2		10.2695	93.025	70.42	12.955	60.42	49.185	146.65	15.745	12.55	94.12	137.4	20.09	136.15	10.815	1.0825	1.105	3.4495	0.927	3.654	435.05	30.895	62.715	7.1065	27.38	5.2015	1.0555	4.545	0.6105	3.6865	0.6945	2.096	0.2965	2.033	0.2905
Huron	HU12	6	1998.25	0.0865	8542.45	37039.5	17619	1207.9	11.5285	23827	616.93	-66.6129	419.975	7131		10.9	98.56	73.21	14.29	71.165	51.915	163.75	16.565	12.655	99.01	135.2	21.105	136.05	11.125	1.2725	1.1825	3.842	1.015	3.697	435.7	32.21	65.29	7.3445	28.64	5.3205	1.0765	4.6275	0.6255	3.712	0.722	2.155	0.3075	2.0685	0.3015
Huron	HU12	7	1995.1	0.0812	9560.25	30904.5	19821.5	1308.55	12.9545	20571	619.425	-62.9958	503.085	7417.05		11.49	103.5	76.925	14.54	66.89	56.36	174	17.545	14.43	104.8	137.4	21.72	131.75	11.71	1.108	1.289	4.0475	0.992	4.1785	453.35	35.44	67.23	7.6165	29.565	5.5425	1.119	4.76	0.6525	3.9505	0.758	2.224	0.315	2.1505	0.31
Huron	HU12	8	1991.65	0.07725	9246.15	27843.5	19785	1276.45	12.647	18781	588.585	-73.9145	550.44	7219.25		11.935	107.45	80.015	15.54	77.56	55.41	181.7	17.88	14.915	107.4	139.1	22.61	138.3	12.07	1.139	1.3205	8.116	1.075	4.377	462.75	34.23	69.17	7.8805	30.47	5.693	1.1595	4.9435	0.6705	4.0295	0.7635	2.294	0.3255	2.181	0.316
Huron	HU12	10	1984.45	0.0776	8964.05	32070	17932.5	1255.25	12.079	21333.5	515.225	-73.3431	486.265	7418.1		11.125	99.57	74.64	14.055	63.63	50.38	167.85	16.825	11.92	101.025	142.25	21.5	139.6	11.59	1.104	1.0535	3.883	0.986	4.0855	444.15	31.8	64.39	7.3825	28.67	5.3705	1.104	4.6265	0.6335	3.802	0.7255	2.191	0.31	2.0975	0.3045
Huron	HU12	12	1976.65	0.07675	8713.95	31725.5	18233.5	1179.8	11.4985	20960.5	492.405	-70.5585	491.255	7165		10.9	96.175	74.06	13.775	70.735	50.19	177.75	16.59	13.605	98.055	140.9	20.97	139.25	11.245	1.4125	1.3135	4.0425	1.0105	3.9035	437.75	31.06	62.755	7.172	27.745	5.2475	1.064	4.543	0.6215	3.798	0.7125	2.1655	0.301	2.079	0.2965
Huron	HU12	14	1968.35	0.0728	9441.8	28828.5	19598.5	1262.25	12.2045	19321	501.195	-51.308	524.18	7248.4		11.205	101.115	77.38	27630	895.5	216.15	190.4	17.23	14.985	102.25	141.9	21.95	138.95	36.025	4.193	1.479	5.3985	1.4925	4.155	461.8	32.58	65.385	7.535	29.015	5.5095	1.1175	4.785	0.6505	3.946	0.745	2.2545	0.3145	2.1515	0.312
Huron	HU12	15	1964.1	0.074	8714.25	29509.5	19377	1181.7	10.4605	19435	478.275	-77.4497	533.38	7061.45		10.65	95.225	72.175	13.87	61.98	49.845	173.55	16.755	14.01	98.51	142	20.91	138.15	11.275	1.44	1.3425	4.465	1.1105	4.1575	448.15	30.75	61.865	7.2065	27.71	5.2225	1.0625	4.5355	0.616	3.729	0.708	2.126	0.298	2.043	0.2925
Huron	HU12	17	1954.2	0.0665	8026.45	38076.5	16299	1092.85	9.68395	24294	402.185	-87.398	431.69	6644.2		10.108	89.695	66.365	12.23	52.345	45.68	157.9	15.705	11.6	92.175	141.05	20.07	132.45	10.9	1.121	1.423	4.083	1.0605	3.616	431	29.295	58.575	6.9315	26.655	5.0245	1.03	4.3575	0.5905	3.567	0.6945	2.0705	0.2875	1.977	0.2855
Huron	HU12	19	1942.7	0.0699	7895.9	37280.5	14902.5	1123.4	9.8726	23920.5	485.645	-85.1305	417.68	6681		10.355	91.41	63.895	12.06	43.24	40.805	131.9	15.76	9.11	94.465	141.35	20.59	136	11.06	1.1085	1.428	3.48	1.0205	3.5775	440.45	30.29	61.425	7.1305	27.535	5.229	1.0695	4.525	0.6175	3.7065	0.6985	2.1	0.299	2.051	0.2935
Huron	HU12	21	1931.5	0.0692	8138.5	36311.5	15845.5	1163.15	11.535	23485.5	390.5	-79.4911	428.145	7277.25		10.45	90.365	63.15	12.86	40.8	37.235	123.55	15.945	8.6205	94.55	142.25	20.71	137.65	11.14	1.1635	1.188	3.1475	0.817	3.5115	435.25	30.22	60.525	7.118	27.38	5.146	1.0575	4.5005	0.612	3.6495	0.7025	2.133	0.2985	2.0465	0.294
Huron	HU12	23	1921.2	0.0876	7513.1	35472.5	14964	1088.85	9.9862	22959	347.49	-90.5602	452.415	6628.7		10.61	91.915	63.39	12.585	37.455	33.38	95.35	15.705	8.02	94.08	143.1	20.875	145.25	10.845	1.064	0.7365	2.272	0.6365	3.44	442.15	30.04	59.98	7.1445	27.245	5.1585	1.064	4.4675	0.613	3.674	0.701	2.106	0.299	2.0855	0.2985
Huron	HU12	25	1911.53	0.0869333	7025.3	46255	15112	1147.3	11.543	29086.5	374.715	-158.475	429.905	7149.65		10.129	87.755	61.26	11.8	33.585	30.45	78.385	14.715	6.588	89.56	140.15	20.29	137.2	10.65	0.8875	0.3905	1.7775	0.4675	3.3075	410.9	29.19	58.415	6.929	26.705	5.037	1.041	4.4035	0.6115	3.6055	0.687	2.06	0.2925	1.9915	0.2855
Huron	HU12	26	1906.7	0.0866	7220.9	39589	16923	1189.35	10.5099	25263	389.485	-172.322	587.9	6929.1		10.745	93.025	66.065	16.51	52.66	29.76	79.29	15.805	7.103	96.82	142.95	21.4	138.7	11.37	1.1575	0.3025	1.8445	0.428	3.574	437.55	30.775	61.68	7.3345	28.685	5.4115	1.0995	4.66	0.641	3.84	0.73	2.225	0.3135	2.1325	0.306
Huron	HU12	30	1883.2	0.0975	7183.75	39269.5	15465	1205.1	10.3047	25143.5	339.895	-154.794	450.375	7356.7		10.28	87.835	62.28	11.935	33.46	25.465	67.995	15.23	5.804	91.64	146.2	20.2	143	10.73	0.834	0.2165	1.536	0.364	3.215	431.6	29.12	58.68	6.9695	26.885	5.1085	1.0505	4.4345	0.6025	3.616	0.6835	2.0835	0.2935	1.9895	0.288
Huron	HU12	34	1848.89	0.0752	7145.35	29611	14919	1144.25	9.69305	19374	283.81	-172.99	435.14	6423.75		10.54	92.84	65.43	12.115	34.585	27.52	72.27	15.65	5.726	95.66	148.9	21.455	152.9	11.29	0.5595	0.385	1.5435	0.374	3.3545	453.3	30.825	61.145	7.379	28.465	5.353	1.1115	4.7345	0.648	3.8225	0.7275	2.1805	0.312	2.123	0.3085
Huron	HU12	38	1814.49	0.0752	6810.5	36980	15248.5	1137.45	9.25915	23456.5	408.735	-164.515	497.27	6747.35		10.385	90.185	63.625	12.385	34.355	27.465	71.365	15.335	5.8225	93.74	148.65	21.04	146.5	10.835	0.7935	0.2375	1.5815	0.369	3.395	443	29.955	59.81	7.214	27.835	5.2645	1.087	4.5875	0.63	3.793	0.7245	2.1935	0.309	2.1175	0.3055
[truncated: 79 more columns]
